1 **Title:** Synaptic plasticity regulated by phosphorylation of PSD-95 Serine 73 in dorsal CA1 is  
2 required for contextual fear extinction

3 **Authors:** Magdalena Ziółkowska<sup>&.1</sup>, Małgorzata Borczyk<sup>&.1,2</sup>, Agata Nowacka<sup>1</sup>, Maria  
4 Nalberczak-Skóra<sup>1</sup>, Małgorzata Alicja Śliwińska<sup>1,3</sup>, Magdalena Robacha<sup>1</sup>, Kacper Łukasiewicz<sup>1</sup>,  
5 Anna Cały<sup>1</sup>, Edyta Skonieczna<sup>1</sup>, Kamil F. Tomaszewski<sup>1</sup>, Tomasz Wójtowicz<sup>4</sup>, Jakub  
6 Włodarczyk<sup>4</sup>, Tytus Bernas<sup>3,5</sup>, Ahmad Salamian<sup>1</sup> and Kasia Radwanska<sup>1\*</sup>.

7 <sup>1</sup>Laboratory of Molecular Basis of Behavior, the Nencki Institute of Experimental Biology of Polish  
8 Academy of Sciences.

9 <sup>2</sup>Department Molecular Neuropharmacology, Maj Institute of Pharmacology of Polish of Academy of  
10 Sciences, Warsaw, Poland.

11 <sup>3</sup>Laboratory of Imaging Tissue Structure and Function, The Nencki Institute of Experimental Biology  
12 of Polish Academy of Sciences, Warsaw, Poland.

13 <sup>4</sup>Laboratory of Cell Biophysics, the Nencki Institute of Experimental Biology of Polish Academy of  
14 Sciences.

15 <sup>5</sup>Department of Anatomy and Neurology, VCU School of Medicine, 1101 East Marshall Street,  
16 Richmond, Virginia 23298.

17 <sup>&</sup>equal contribution.

18 **\*Corresponding author:** Kasia Radwanska, Ph.D., Laboratory of Molecular Basis of Behavior,  
19 Nencki Institute of Experimental Biology of Polish Academy of Sciences, ul. L. Pasteura 3, Warsaw  
20 02-093, Poland; e-mail: [k.radwanska@nencki.edu.pl](mailto:k.radwanska@nencki.edu.pl); tel: +48501736942.

21 Key words: PSD-95, contextual fear memory, extinction, dorsal CA1, synaptic plasticity

22 **Number of pages:** 35

23 **Number of figures, tables, multimedia and 3D models (separately)**

24 Figures (6), tables (0), multimedia and 3D models (0), supplementary figures (5)

25 **Number of words for Abstract, Introduction, and Discussion (separately)**

26 Abstract (128), Introduction ([623](#)), Discussion ([2061](#))

27

28 **ABSTRACT**

29 The ability to extinguish fearful memories is essential for survival. Accumulating data indicate that the  
30 dorsal CA1 area (dCA1) contributes to this process. However, the cellular and molecular basis of fear  
31 memory extinction remains poorly understood. Postsynaptic density protein 95 (PSD-95) regulates the  
32 structure and function of glutamatergic synapses. Here, using dCA1-targeted genetic and  
33 chemogenetic manipulations *in vivo* combined with PSD-95 immunostaining and 3D electron  
34 microscopy *ex vivo*, we demonstrate that phosphorylation of PSD-95 at serine 73 PSD-95(S73) is  
35 necessary for contextual fear extinction-induced expression of PSD-95 and synaptic plasticity.  
36 Moreover, PSD-95(S73) phosphorylation is not necessary for fear memory formation and recall but is  
37 required for extinction of contextual fear. Overall, our data shows how PSD-95-dependent synaptic  
38 plasticity in the hippocampus contributes to the persistence of fear memories.

## 39 INTRODUCTION

40 The ability to form, store, and update fearful memories is essential for animal survival. In  
41 mammals, the formation and updating of such memories involve the hippocampus (Baldi and  
42 Bucherelli, 2015; Frankland and Bontempi, 2005; Neves et al., 2008). In particular, the formation of  
43 contextual fear memories strengthens Schaffer collaterals in the dorsal CA1 area (dCA1) through  
44 NMDA receptor-dependent Hebbian forms of synaptic plasticity (Abraham et al., 2019; Bliss and  
45 Collingridge, 1993; Morris et al., 2003) linked with growth and addition of new dendritic spines  
46 (harboring glutamatergic synapses) (Aziz et al., 2019; Mahmmod et al., 2015; Radwanska et al.,  
47 2011; Restivo et al., 2009). Similarly, contextual fear extinction induces functional, structural, and  
48 molecular alterations of dCA1 synapses (Garín-Aguilar et al., 2012; Schuette et al., 2020; Stansley et  
49 al., 2018). While the role of dCA1 synaptic plasticity in contextual fear memory formation has been  
50 recently questioned (Bannerman et al., 2014, 2012), its role in contextual fear memory extinction is  
51 mostly unknown. Understanding the molecular and cellular mechanisms that underlie fear extinction  
52 memory is crucial to develop new therapeutic approaches to alleviate persistent and unmalleable fear.

53 PSD-95 is the major scaffolding protein of a glutamatergic synapse (Cheng et al., 2006),  
54 affecting its stability and maturation (Ehrlich et al., 2007; Steiner et al., 2008; Sturgill et al., 2009; Taft  
55 and Turrigiano, 2014) as well as functional (Béique and Andrade, 2003; Ehrlich and Malinow, 2004;  
56 Migaud et al., 1998; Stein et al., 2003) and structural plasticity (Chen et al., 2011; Nikonenko et al.,  
57 2008; Steiner et al., 2008). PSD-95 interacts directly with NMDA receptors and through an auxiliary  
58 protein stargazin with AMPA receptors (Kornau et al., 1995; Schnell et al., 2002). Interaction of PSD-  
59 95 with stargazin regulates the synaptic content of AMPARs (Bats et al., 2007; Chetkovich et al.,  
60 2002; Schnell et al., 2002). In agreement with these findings, overexpression of PSD-95 occludes  
61 long-term potentiation (LTP) (Ehrlich and Malinow, 2004; Stein et al., 2003) and decreases the  
62 threshold for long-term depression (LTD) induction (Béique and Andrade, 2003). Conversely, mice  
63 lacking functional PSD-95 protein have greatly enhanced hippocampal, NMDAR-dependent LTP,  
64 whereas NMDAR-dependent LTD is absent (Migaud et al., 1998). Synaptic localisation of PSD-95 is  
65 controlled by a range of posttranslational modifications with opposing effects on synaptic retention

66 (Vallejo et al., 2017). One such modification is the phosphorylation of Serine 73 (S73). It was first  
67 described as a target of  $\alpha$ CaMKII that promotes PSD-95 dissociation from the NMDA receptor  
68 subunit NR2A (Gardoni et al., 2006). Further studies showed that S73 phosphorylation induces PSD-  
69 95 activity-dependent trafficking that is necessary for termination of synaptic growth after NMDAR  
70 stimulation, as well as PSD-95 downregulation during NMDAR-dependent LTD (Nowacka et al.,  
71 2020; Steiner et al., 2008). Interestingly, the loss-of-function PSD-95 mutant mice lacking the  
72 guanylate kinase domain of PSD-95 (Migaud et al., 1998) show normal contextual fear memory but  
73 impaired extinction of contextual fear (Fitzgerald et al., 2015), indicating that PSD-95-dependent  
74 synaptic plasticity contributes to the updating rather than the formation of contextual fear memory.  
75 The function of PSD-95(S73), or other PSD-95 modifications, in memory processes is mostly  
76 unknown. Here, we hypothesized that PSD-95(S73)-dependent synaptic plasticity in dCA1 contributes  
77 to extinction of contextual fear memories.

78         The present study tests this hypothesis by integrated analyses of PSD-95 protein expression  
79 and dendritic spines morphology with nanoscale resolution, combined with genetic and chemogenetic  
80 manipulations and behavioral studies. Using dCA1-targeted overexpression of PSD-95 and  
81 chemogenetic manipulations, we show that phosphorylation of PSD-95(S73) is necessary for  
82 contextual fear extinction-induced PSD-95 expression and remodeling of dendritic spines. Moreover,  
83 it is not necessary for fear memory formation but required for fear extinction even after extensive fear  
84 extinction training. Overall, our data indicate that the dCA1 PSD-95(S73)-driven synaptic processes  
85 during the extinction of fear memories enable extinction of the contextual fear memory.

86

## 87 **RESULTS**

88 Previous data indicate that loss-of-function mutant mice lacking the guanylate kinase domain of PSD-  
89 95 do not show contextual fear extinction, while contextual memory formation is intact (Fitzgerald et  
90 al., 2015). Moreover, the contextual fear extinction induces dendritic spine remodeling in the dorsal  
91 CA1 area (dCA1) (Garín-Aguilar et al., 2012). Based on these findings, we hypothesise that PSD-95  
92 controls extinction-induced remodeling of dCA1 neuronal circuits supporting contextual fear memory  
93 extinction.

### 94 **Acquisition and extinction of contextual fear memory**

95 To study the synaptic mechanisms of contextual fear extinction memory, we used Pavlovian  
96 contextual fear conditioning. Mice were exposed to a new context, and 5 electric shocks (5US) were  
97 delivered. The fear memory was extinguished the next day by re-exposure to the same context without  
98 the delivery of USs (**Figure S1**). Mice showed low freezing levels in a novel context before delivery  
99 of electric shocks (pre-US), and freezing increased during the training (post-US), indicating fear  
100 memory formation. Twenty-four hours later, mice were re-exposed for 30 minutes to the training  
101 context without the US's presentation for the fear extinction memory session (Extinction). Freezing  
102 levels were high at the beginning of the session, indicating fear memory retrieval and decreased within  
103 the session, indicating extinction learning. Twenty-four hours later, we tested for 5 minutes the  
104 consolidation of fear extinction memory (Test). During the Test, freezing levels were lower than at the  
105 beginning of Extinction, indicating long-term fear extinction memory formation.

### 106 **The effect of contextual fear extinction memory on PSD-95 expression in dCA1.**

107 To investigate the role of PSD-95 in contextual fear memory consolidation and extinction, we  
108 analysed the expression of PSD-95 protein in Thy1-GFP(M) mice (Feng et al., 2000). Thy1-GFP(M)  
109 mice express GFP in a sparsely distributed population of the glutamatergic neurons, allowing for  
110 dendritic spines visualisation (**Figure 1A**). The expression of PSD-95 protein, and its colocalization  
111 with dendritic protrusions, were analysed in three domains of dCA1: stratum oriens (stOri), stratum  
112 radiatum (stRad) and stratum lacunosum-moleculare (stLM) (**Figure 1B-C**). We analysed these

113 regions separately as previous data found dendrite-specific long-term dendritic spines changes after  
 114 contextual fear conditioning (Restivo et al., 2009).

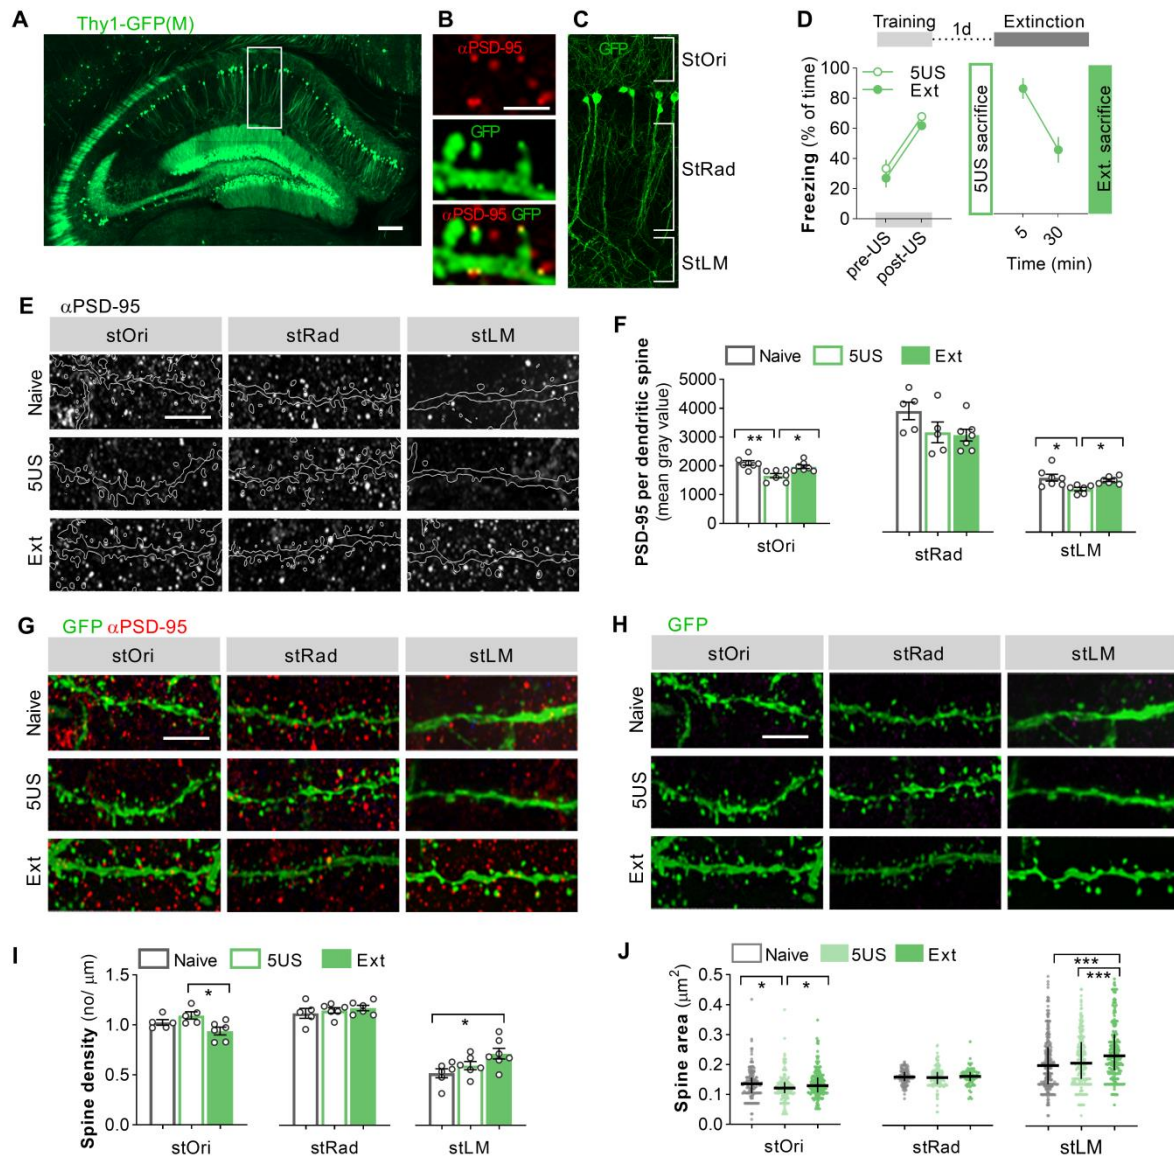

115 **Figure 1. Formation and extinction of contextual fear memory regulate expression of synaptic**  
 116 **PSD-95 protein and remodeling of dendritic spines in dCA1.** (A-C) Dendritic spines were analysed  
 117 in three domains of the dendritic tree of dCA1 pyramidal neurons in Thy1-GFP(M) mice: stOri, stRad  
 118 and stLM. (A) Microphotography of dCA1 of a Thy1-GFP(M) mouse. (B) High magnification of  
 119 confocal scans showing colocalization of PSD-95 immunostaining and dendritic spines. (C) Division  
 120 of dCA1 dendritic tree domains. (D) Experimental timeline and freezing levels of mice from two  
 121 experimental groups: fear conditioning training (5US, n = 6) only and fear extinction (Ext, n = 7). (E)  
 122 Representative confocal images of PSD-95 immunostaining (maximum projections of z-stacks  
 123 composed of 20 scans) are shown for three domains of the dendritic tree. (F) Summary of data  
 124 showing PSD-95 expression in stOri (mouse/spine: Naïve = 6/579; 5US = 6/807; Ext = 7/986), stRad  
 125 (mouse/spine: Naïve = 6/571; 5US = 6/619; Ext = 7/712), and stLM (mouse/spine: Naïve = 6/705;  
 126 5US = 6/650; Ext = 7/925). (G-H) Representative confocal images of dendrites colocalized with PSD-  
 127 95 immunostaining from Thy1-GFP(M) mice that underwent training are shown for three domains of  
 128 the dendritic tree. (I) Summary of data showing dendritic spines density in stOri (mouse/dendrite:  
 129



130 Naïve = 6/16; 5US = 6/24; Ext = 7/34), stRad (mouse/dendrite: Naïve = 6/18; 5US = 6/20; Ext =  
131 7/19), and stLM (mice/dendrite: Naïve = 6/31; 5US = 6/25; Ext = 7/37). **(J)** Summary of data showing  
132 average dendritic spine area in stOri, (mice/ spines: Naïve = 6/579; 5US = 6/807; Ext = 7/986), stRad  
133 (mouse/spine: Naïve = 6/571; 5US = 6/619; Ext = 7/712), and stLM (mouse/spine Naïve = 6/705; 5US  
134 = 6/650; Ext = 7/925). For F and I, each dot represents one mouse. For J, each dot represents one  
135 dendritic spine. Scale bars: A: 0.5 mm, B: 8  $\mu$ m, E, G, H: 15  $\mu$ m. \*P < 0.05, \*\*P < 0.01; \*\*\*P < 0.001.

136

137 Thy1-GFP(M) mice underwent contextual fear conditioning. They showed low freezing levels in the  
138 novel context before delivery of electric shocks, after which freezing levels increased the remainder of  
139 the training session (**Figure 1D**) (RM ANOVA, effect of time:  $F(1, 7) = 734.1, P < 0.0001$ ). Twenty-  
140 four hours later, one group of mice was sacrificed (5US), and the second group was re-exposed to the  
141 training context without presentation of US for fear extinction (Ext). Freezing levels were high at the  
142 beginning of the session and decreased within the session (**Figure 1D**) ( $t = 3.720, df = 6, P < 0.001$ ).  
143 Mice were sacrificed immediately after the fear extinction session. As controls, naïve mice were taken  
144 from their home cages. The analysis of PSD-95 immunostaining revealed a significant effect of  
145 training (RM ANOVA,  $F(2, 22) = 7.69, P = 0.003$ ) and dCA1 region ( $F(1.317, 18.44) = 141.0; P <$   
146  $0.001$ ) on PSD-95 expression per dendritic spine (**Figure 1F**). *Post hoc* tests indicated that in the stOri  
147 and stLM, PSD-95 expression decreased in the 5US group, compared to the Naïve mice (Tukey's  
148 multiple comparisons test, stOri:  $P = 0.004$ ; stLM:  $P = 0.038$ ), and increased after extinction (Ext),  
149 compared to 5US group (stOri:  $P = 0.019$ ; stLM:  $P = 0.009$ ) (**Figure 1F**). No difference in PSD-95  
150 levels was observed in stRad between the groups. Thus, our data show that both the formation and  
151 extinction of contextual fear memory regulate PSD-95 levels in dCA1 strata, and the effect is specific  
152 to stOri and stLM regions.

153 Since PSD-95 is expressed in large and mature spines (El-Husseini et al., 2000), we checked  
154 whether the changes in PSD-95 levels were associated with dendritic spine remodelling. We did not  
155 observe a significant effect of training (RM ANOVA,  $F(2, 48) = 3.149, P = 0.052$ ), but we did  
156 discover a region effect ( $F(1.788, 42.92) = 7.381, P = 0.002$ ) and training  $\times$  region interaction ( $F(4, 48)$   
157  $= 5.48, P = 0.001$ ) on dendritic spines density (**Figure 1I**). In stOri, dendritic spines density decreased  
158 after fear extinction training (Ext) compared to the trained mice (5US) (Tukey's test,  $P = 0.025$ )



159 **(Figure 1I)**. In stLM, dendritic spine density was increased in the Ext group compared to the Naïve  
160 mice ( $P = 0.039$ ). No changes in spine density were observed in the stRad. Moreover, we found a  
161 significant effect of training on the median area of dendritic spines in the stOri (Kruskal-Wallis test,  $H$   
162  $= 8.921$ ,  $P = 0.012$ ) and stLM ( $H = 28.074$ ,  $P < 0.001$ ), but not stRad ( $H = 5.919$ ,  $P = 0.744$ ) **(Figure**  
163 **1J)**. In stOri, the median spine area was decreased in the 5US group compared to the Naïve mice  
164 (Dunn's multiple comparisons test,  $P = 0.032$ ) and increased after extinction (Ext) compared to the  
165 5US group ( $P = 0.02$ ). In stLM, the median spine area did not change after training (5US), compared  
166 to the Naïve mice ( $P > 0.05$ ), but increased after extinction (Ext), compared to the 5US group ( $P =$   
167  $0.005$ ). Thus, increased expression of PSD-95 per dendritic spine in stOri and stLM during contextual  
168 fear extinction, as compared to the 5US group, was coupled with an increased median spine area.  
169 Overall, our data indicate remodelling of the dCA1 neuronal circuits during contextual fear extinction  
170 that presumably involves upregulation of PSD-95 expression per dendritic spine (which may result  
171 from upregulation of PSD-95 levels as well as elimination of small spines with low PSD-95 content).  
172 In a separate experiment we found that fear extinction-induced PSD-95 and dendritic spines changes  
173 were transient, as they were not observed 60 minutes after contextual fear extinction session, and they  
174 were specific for fear extinction, as we did not find them in the animals exposed to neutral context,  
175 as compared to the 5US group **(Figure S2)**.

### 176 **The role of dCA1 PSD-95(S73) phosphorylation in regulation of fear extinction-induced PSD-95** 177 **expression.**

178 Based on the observed changes of PSD-95 levels and dendritic spines in dCA1 during contextual fear  
179 extinction, we hypothesized that extinction-induced upregulation of PSD-95 enables remodeling of the  
180 necessary circuits for contextual fear extinction memory. To validate this hypothesis, we used dCA1-  
181 targeted overexpression of phosphorylation-deficient PSD-95, with serine 73 mutated to alanine [PSD-  
182 95(S73A)]. We focused on serine 73 as its phosphorylation by  $\alpha$ CaMKII negatively regulates activity-  
183 induced spine growth (Gardoni et al., 2006; Stein et al., 2003) and  $\alpha$ CaMKII autophosphorylation-  
184 deficient mice have impaired contextual fear memory extinction (Radwanska et al., 2011).  
185 Accordingly, we expected that overexpression of PSD-95(S73A) would escalate fear extinction-

186 induced accumulation of PSD-95 and spine growth. We did not use a phospho-mimetic form of PSD-  
187 95 (S73D), as this mutant protein localizes mostly in dendrites in our hands (data not shown) and,  
188 therefore, unlikely affects synaptic function.

189 We designed and produced adeno-associated viral vectors, isotype 1 and 2 (AAV1/2)  
190 encoding mCherry under  $\alpha$ CaMKII promoter (Control), wild-type PSD-95 protein fused with mCherry  
191 (AAV1/2:CaMKII\_PSD-95(WT):mCherry) (WT) and phosphorylation-deficient PSD-95, where  
192 serine 73 was changed for alanine, fused with mCherry, (AAV1/2:CaMKII\_PSD-95(S73A):mCherry)  
193 (S73A). We did not use a PSD-95 shRNA and shRNA-resistant PSD-95 genetic replacement strategy  
194 (Steiner et al., 2008) as these viruses depleted total PSD-95 levels *in vivo* in our hands (data not  
195 shown). The Control, WT and S73A viruses were stereotactically injected into the dCA1 of C57BL/6J  
196 mice (**Figure 2A**). Viral expression was limited to the dCA1 (**Figure 2B**). Expression of WT and  
197 S73A viruses resulted in significant overexpression of PSD-95 protein in three domains of a dendritic  
198 tree, compared to the Control virus (**Figure 2C-D**) (effect of virus:  $F(2, 30) = 13.09$ ,  $P < 0.0001$ ).  
199 Correlative light and electron microscopy confirmed that the overexpressed PSD-95 (WT and S73A)  
200 co-localised with postsynaptic densities (PSDs) of postsynaptic glutamatergic synapses; but weaker  
201 signal was also present in dendrites (**Figure 2E**). Next, we investigated how fear extinction memory  
202 affects exogenous PSD-95 protein expression.

203 A new cohort of mice with dCA1-targeted expression of the Control, WT and S73A  
204 underwent contextual fear conditioning (**Figure 2F**). Mice in all experimental groups showed  
205 increased freezing levels at the end of the training (RM ANOVA, effect of training:  $F(1, 30) = 269.4$ ,  
206  $P < 0.001$ , effect of virus:  $F(2, 30) = 2.815$ ,  $P = 0.076$ ) (**Figure 2F**). Half of the mice were sacrificed  
207 24 hours after the fear conditioning (5US). The remaining half were re-exposed to the training box for  
208 fear extinction and sacrificed immediately afterward (Ext). All animals showed high freezing levels at  
209 the beginning of the session, which decreased during the session indicating extinction learning (RM  
210 ANOVA, effect of training:  $F(1, 15) = 65.68$ ,  $P < 0.001$ ). No effect of the virus was found ( $F(2, 15) =$   
211  $0.993$ ,  $P = 0.393$ ) (**Figure 2F**).

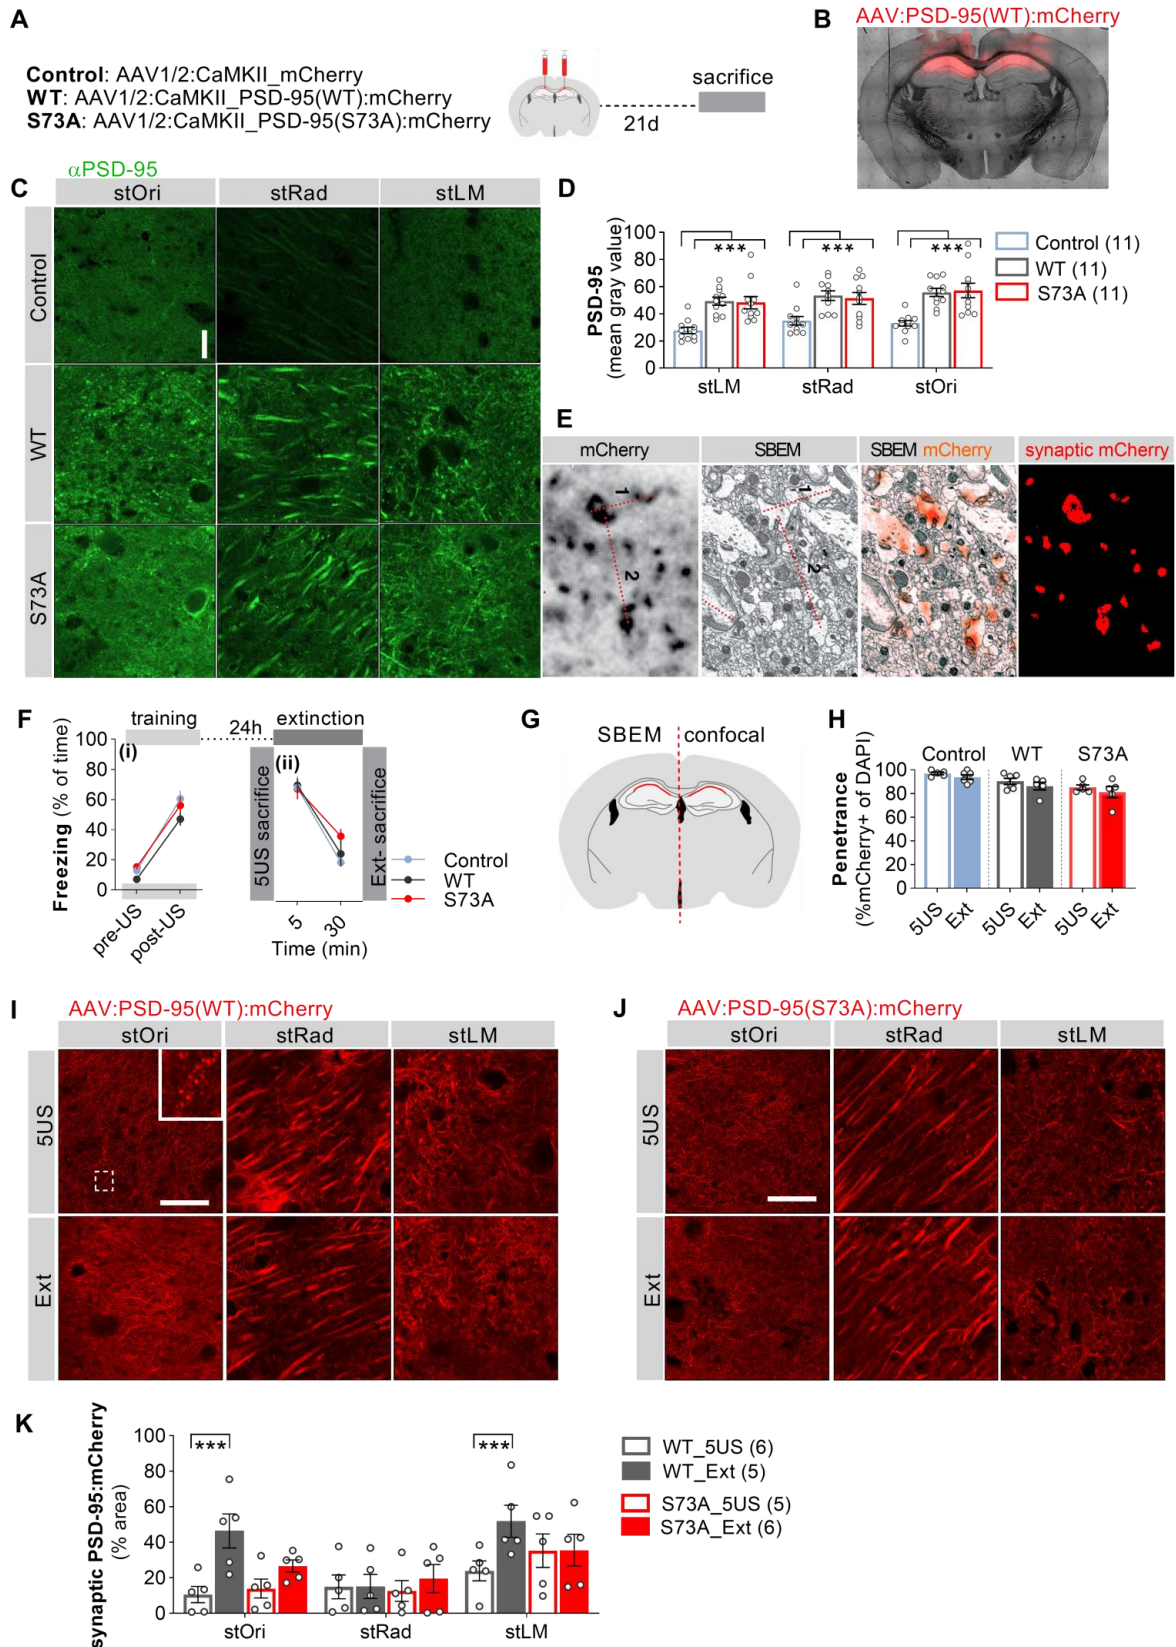

212  
213  
214  
215  
216

**Figure 2. Phosphorylation of PSD-95(S73) is required for upregulation of PSD-95 levels during fear extinction training.** (A) Mice were stereotactically injected in the dCA1 with AAV1/2 encoding Control (mCherry, n = 9), PSD-95(WT) (WT, ) or PSD-95(S73A) (S73A). (B) Microphotography of a brain with dCA1 PSD-95(WT):mCherry (WT) expression. (C-D) Analysis of PSD-95 overexpression.

217 (C) Representative confocal scans of the brain slices immunostained for PSD-95. Scale bar, 10  $\mu$ m.  
218 (D) Quantification of local expression of PSD-95 in three domains of dCA1 in mice with Control, WT  
219 and S73A. (E) Overexpressed WT co-localises with postsynaptic densities. Single confocal scan of  
220 overexpressed WT in dCA1, SBEM scan of the same area, superposition of confocal (orange) and  
221 SBEM images based on measured distances between large synapses (1 & 2), and thresholder synaptic  
222 WT signal. Measurements: (confocal image) 1: 3.12  $\mu$ m, 2: 4.97  $\mu$ m; (SBEM image) 1: 2.98  $\mu$ m, 2:  
223 4.97  $\mu$ m. (F) Experimental timeline and percentage of freezing during (i) fear conditioning (5US) and  
224 (ii) fear extinction (Ext) session of mice with dCA1-targeted expression of Control, WT or S73A  
225 (mice: 5US/Ext, Control = 5/6; WT = 5/6; S73A = 5/5). (G) Illustration of the brain processing  
226 scheme. (H) Summary of data showing penetrance of the viruses in dCA1 (sections used for confocal  
227 and SBEM analysis). (I-K) Expression of the exogenous PSD-95 in dCA1. (I-J) Representative,  
228 confocal scans of the fused mCherry protein in three strata of dCA1. Inset: magnification of a dashed  
229 line rectangle. Scale bars, 10  $\mu$ m. (K) Quantification of the PSD-95:mCherry-positive puncta (mice:  
230 5US/Ext, Control = 5/6; WT = 5/6; S73A = 5/5). For C.ii, G and H.iii, each dot on the graphs  
231 represents one mouse (n indicated in the legends). \*\*\*P < 0.001.  
232

233 For each animal, half of the brain was chosen at random for confocal analysis of the  
234 overexpressed PSD-95 protein, and the other half was processed for serial face-block scanning  
235 electron microscopy (SBEM) to analyse synapses at nanoscale resolution (Denk and Horstmann,  
236 2004) (Figure 2G). The AAVs penetrance did not differ between the experimental groups (5US vs  
237 Ext) and reached over 80% in the analysed sections of dCA1 (Figure 2H). To assess the effect of the  
238 fear extinction session on the exogenous synaptic PSD-95 (WT and S73A) protein levels, we analysed  
239 fluorescent puncta formed by mCherry fused with PSD-95 protein that were small and intensive  
240 (Figure 2A, I and J). Three-way ANOVA indicated a significant effect of the training ( $F(1, 52) =$   
241  $11.36, P = 0.0014$ ) and dCA1 domain ( $F(2, 52) = 8.677, P = 0.006$ ) on the expression of PSD-  
242 95:mCherry, but no effect of the virus ( $F(1, 52) = 0.8200, P = 0.369$ ). *Post hoc* LSD analysis for the  
243 planned comparisons revealed that WT synaptic expression was upregulated in stOri ( $P = 0.016$ ) and  
244 stLM ( $P = 0.035$ ), but not stRad ( $P = 0.98$ ), after the extinction session (Ext), compared to the 5US  
245 group (Figure 2K). Thus, the exogenous synaptic PSD-95(WT) protein levels were upregulated during  
246 fear extinction training in the same way as endogenous synaptic PSD-95. Surprisingly, no significant  
247 difference in the exogenous synaptic PSD-95(S73A) levels was observed between the Ext and 5US  
248 groups in all three strata of dCA1 (Figure 2K). Therefore, our data indicate that phosphorylation of  
249 PSD-95 at S73 is necessary for the fear extinction-induced upregulation of synaptic PSD-95 levels,



250 although it does not affect the consolidation and recall of contextual fear memory or within-session  
251 reduction of fear.

### 252 **The role of PSD-95(S73) phosphorylation in regulating extinction-induced synapse remodeling.**

253 Since phosphorylation of PSD-95 at S73 is required for the fear extinction-induced upregulation of  
254 synaptic PSD-95, we hypothesized that PSD-95 also regulates extinction-induced synaptic growth. To  
255 test this, we used SBEM to determine dendritic spines density and to reconstruct spines and PSDs in  
256 the stOri (**Figure 3A-C**). PSDs are the postsynaptic elements that scale up with synaptic strength and  
257 are visible in electron microphotographs. In total, we reconstructed 159 spines from the brains of the  
258 mice expressing WT sacrificed 24 hours after contextual fear conditioning (5US) (n=3), and 178  
259 spines from the mice sacrificed after fear extinction (Ext) (n=3). For mice expressing S73A, 183  
260 spines were reconstructed in the 5US group (n=3) and 160 Ext (n=3). Lastly, we reconstructed 364  
261 dendritic spines and PSDs in the Control 5US mice (n=3), and 293 spines from Ext (n =3). Figure 3D  
262 shows reconstructions of dendritic spines from representative SBEM brick scans for each experimental  
263 group.

264 Overexpression of PSD-95 protein (WT and S73A) resulted in decreased dendritic spines  
265 density and increased surface area of PSDs, compared to the Control group (**Figure S3**). We also  
266 observed a significant effect of the training on dendritic spines density ( $F(1, 45) = 8.01, P = 0.007$ ).  
267 *Post hoc* analysis showed that the dendritic spines density was downregulated in the Control and WT  
268 Ext groups compared to their respective 5US groups (Fisher's LSD test for planned comparisons,  $P <$   
269  $0.035$  and  $P < 0.014$ ). No significant difference was observed for S73A Ext and 5US groups (**Figure**  
270 **3E**). Furthermore, the median value of PSD surface areas was increased after the extinction training in  
271 the Control and WT groups (Mann-Whitney test,  $U = 42410, P < 0.001$  and  $U = 9948, P < 0.001$ ), but  
272 not in the S73A group ( $U = 13578, P = 0.246$ ) (**Figure 3F**). The changes of PSDs surface area after  
273 extinction compared to 5US groups were also indicated as shifts in the frequency distribution toward  
274 bigger values in Control and WT groups (**Figure 3G, H**), but not in S73A (**Figure 3I**). We also  
275 observed the upward shift of the correlation lines of spine volume and PSD surface area after  
276 extinction training in Controls (ANCOVA, elevation:  $F(1, 6) = 4.677, P = 0.031$ ) and WT groups

277 (elevation:  $F(1, 319) = 4.256$ ,  $P = 0.039$ ), compared to their respective 5US groups (**Figure 3J, K**).

278 Therefore, dendritic spines had relatively bigger PSDs after fear extinction than the dendritic spines of

279 the same size in the 5US groups. Such a shift was not observed in the mice overexpressing S73A

280 (elevation:  $F(1, 340) = 0.603$ ,  $P = 0.437$ ) (**Figure 3L**). Thus, in Control and WT groups, as in Thy1-

281 GFP mice, elimination of dendritic spines observed after fear extinction was accompanied by an

282 increased median area of the remaining synapses, indicating remodeling of the dCA1 circuits. The

283 overexpression of S73A impaired both fear extinction-induced synaptic elimination and synaptic

284 growth. We also confirmed the effect of PSD-95-overexpression and fear extinction training on

285 synaptic transmission in dCA1 using *ex vivo* field recordings. We observed that after fear extinction

286 the amplitude of field excitatory postsynaptic potentials (fEPSPs) was increased in the stOri dCA1

287 (when Shaffer collaterals were stimulated) of the mice that overexpressed PSD-95(WT), compared to

288 their respective 5US groups (**Figure S4**), indicating enhanced excitatory synaptic transmission. Such

289 change was not seen in S73A mice. There was also no effect of the extinction training on the fiber

290 volley in both WT and S73A groups. Altogether, the electrophysiological analysis shows that PSD

291 morphologic changes and functional alterations of synapses confirm the role of PSD-95 in remodeling

292 of dCA1 circuits in contextual fear extinction.

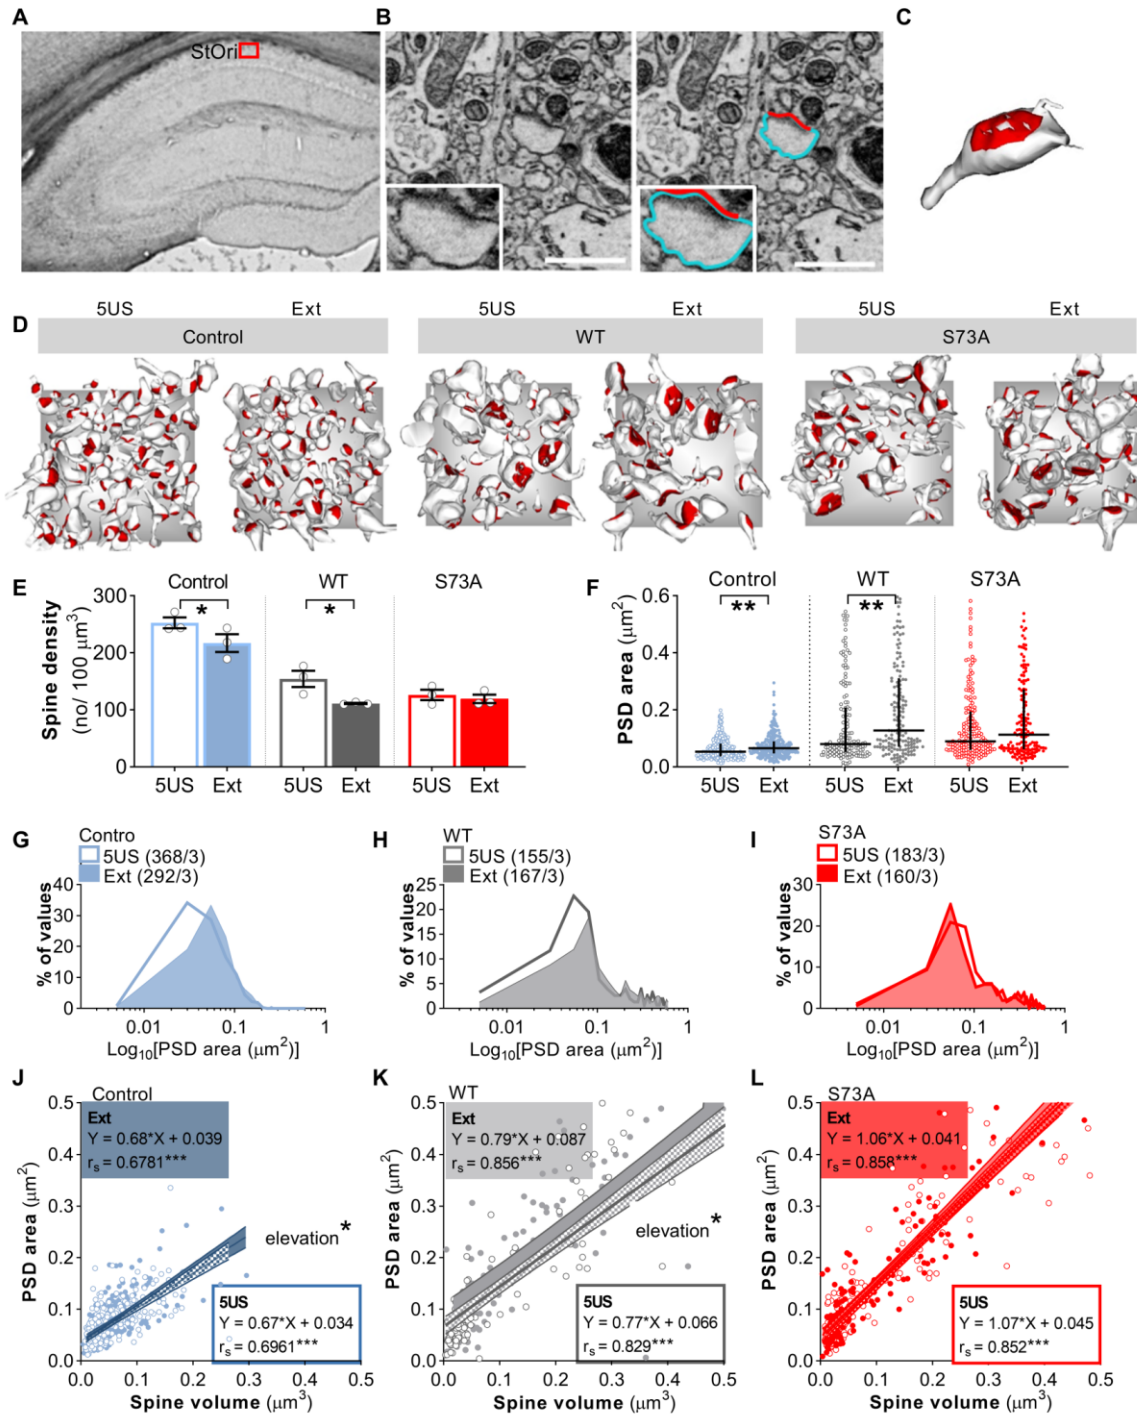

293  
294  
295  
296  
297  
298  
299  
300  
301  
302

**Figure 3. Phosphorylation of PSD-95 at S73 is required for synapse elimination and growth of remaining PSDs in stOri after fear extinction training.** (A-C) The principles for SBEM analysis of the ultrastructure of dendritic spines and PSDs. (A) Microphotography of a dorsal hippocampus with the region of interest for analysis; (B) Tracing of a dendritic spine and PSD. Scale bars, 0.5  $\mu\text{m}$ . A representative trace of a dendritic spine (in blue) and its PSD (in red), and (C) the reconstruction of this spine. (D) Exemplary reconstructions of dendritic spines and their PSDs from SBEM scans. The grey background rectangles are  $x = 4.3 \times y = 4.184 \mu\text{m}$ . Dendritic spines and PSDs were reconstructed and analysed in tissue bricks. (E) Mean density of dendritic spines was downregulated after fear extinction (Ext) compared to trained (5US) Control and PSD-95(WT) (WT), but not PSD-95(S73A)



303 (S73A) groups. **(F)** Median PSD surface area was increased after fear extinction (Ext) in Control and  
304 WT mice but did not change in S73A group. **(G-I)** Distributions were shifted towards bigger values in  
305 **(G)** Control and **(H)** WT groups **(I)** but not in the S73A group. X axes are  $\text{Log}_{10}$ -transformed to show  
306 the differences between the groups. **(J-L)** Graphs showing changes in the correlation of dendritic spine  
307 volume and PSD surface area in **(J)** Control, **(K)** WT, **(L)** and S73A groups before (5US) and after  
308 extinction (Ext) training. For F, and J-L, each dot represents an individual dendritic spine; medians  
309 with IQR are shown. \*\*\* $P < 0.001$ , \*\* $P < 0.01$ , \* $P < 0.05$ . Numbers of the analyzed dendritic  
310 spines/mice are indicated in **(G-I)**.

311

### 312 **The role of dCA1 PSD-95(S73) phosphorylation in contextual fear extinction memory.**

313 Since overexpression of phosphorylation-deficient PSD-95(S73A) impaired extinction-induced  
314 expression of PSD-95 as well as structural and functional changes of synapses but did not affect  
315 within-session fear extinction, we hypothesised that PSD-95-dependent remodeling of synapses is  
316 necessary for consolidation of fear extinction memory. To test this hypothesis, two cohorts of mice  
317 with dCA1-targeted expression of the Control virus, WT or S73A, underwent contextual fear  
318 conditioning and fear extinction training. The first cohort underwent short extinction training with one  
319 30-minut extinction session (Ext1) and 5-minut test of fear extinction memory (Test) **(Figure 4D)**,  
320 while the second underwent extensive fear extinction training with three 30-minute contextual fear  
321 extinction sessions on the days 2, 3, 4 (Ext1-3), followed by spontaneous fear recovery/ remote fear  
322 memory test on day 18, and further four extinction sessions on the days 18, 19, 20, 21 (Ext4-7). Next,  
323 fear generalisation was tested in a context B (CtxB, day 22) **(Figure 4E)**. The post-training analysis  
324 showed that the viruses were expressed in dCA1 **(Figure 4A)**. The Control virus was expressed in  
325 85% of the dCA1 cells, WT in 88% and S73A in 87% **(Figure 4B-C)**. The analysis of short extinction  
326 training (data pooled from two cohorts) showed that in all experimental groups freezing levels were  
327 high at the beginning of Ext1 indicating a similar level of contextual fear memory acquisition **(Figure**  
328 **4D)**. However, freezing measured during the Test was significantly decreased, as compared to the  
329 beginning of Ext1, only in the Control (Fisher's LSD for planned comparisons,  $P < 0.001$ ) and WT ( $P$   
330  $= 0.004$ ) groups, not in the S73A animals ( $P = 0.090$ ) (RM ANOVA, effect of time:  $F(1, 46) = 26.13$ ,  
331  $P < 0.001$ , genotype:  $F(2, 46) = 0.540$ ,  $P = 0.586$ ; time x genotype:  $F(2, 46) = 1.25$ ,  $P = 0.296$ ). The  
332 analysis of freezing levels during the extensive fear extinction training also showed high levels of

333 freezing at the beginning of Ext1 for all experimental groups (**Figure 4E**). In the Control and WT  
334 groups, the freezing levels decreased over consecutive extinction sessions (Ext2-6) and were  
335 significantly lower as compared to Ext1 (Fisher's LSD for planned comparisons,  $P < 0.05$  for all  
336 comparisons), indicating formation of long-term fear extinction memory (RM ANOVA, effect of time:  
337  $F(3.681, 95.70) = 13.01$ ,  $P < 0.001$ ; genotype:  $F(2, 26) = 1.23$ ,  $P = 0.306$ ; time x genotype:  $F(10, 130)$   
338  $= 1.49$ ,  $P = 0.147$ ). We also found no spontaneous fear recovery after 14-day delay (Ext4 vs Ext3;  
339 Control,  $P = 0.806$ ; WT,  $P = 0.248$ ). In the S73A group, the extensive contextual fear extinction  
340 protocol did not reduce freezing levels measured at the beginning of Ext2-6 sessions, as compared to  
341 Ext1 (Fisher's LSD for planned comparisons,  $P > 0.05$  for all comparisons), indicating no fear  
342 extinction (**Figure 4E**). Accordingly we found significantly larger reduction of freezing during  
343 extensive fear extinction training ( $\Delta$ Ext6-Ext1) in the Controls (Tukey's multiple comparisons test,  $P =$   
344  $0.032$ ) and WT animals ( $P = 0.026$ ), as compared to the S73A group (one-way ANOVA,  $F(2, 24.94) =$   
345  $4.98$ ,  $P = 0.015$ ) (**Figure 4F**). We also confirmed that the freezing reaction was specific for the  
346 training context, as it was very low and similar for all experimental groups in the context B (one-way  
347 ANOVA,  $F(2, 17.56) = 0.902$ ,  $P = 0.424$ ) (**Figure 4G**). Thus, our data indicate that overexpression of  
348 S73A in dCA1 does not affect fear memory formation, recall, or within-session extinction but prevents  
349 consolidation of contextual fear extinction memory even after extensive extinction training.

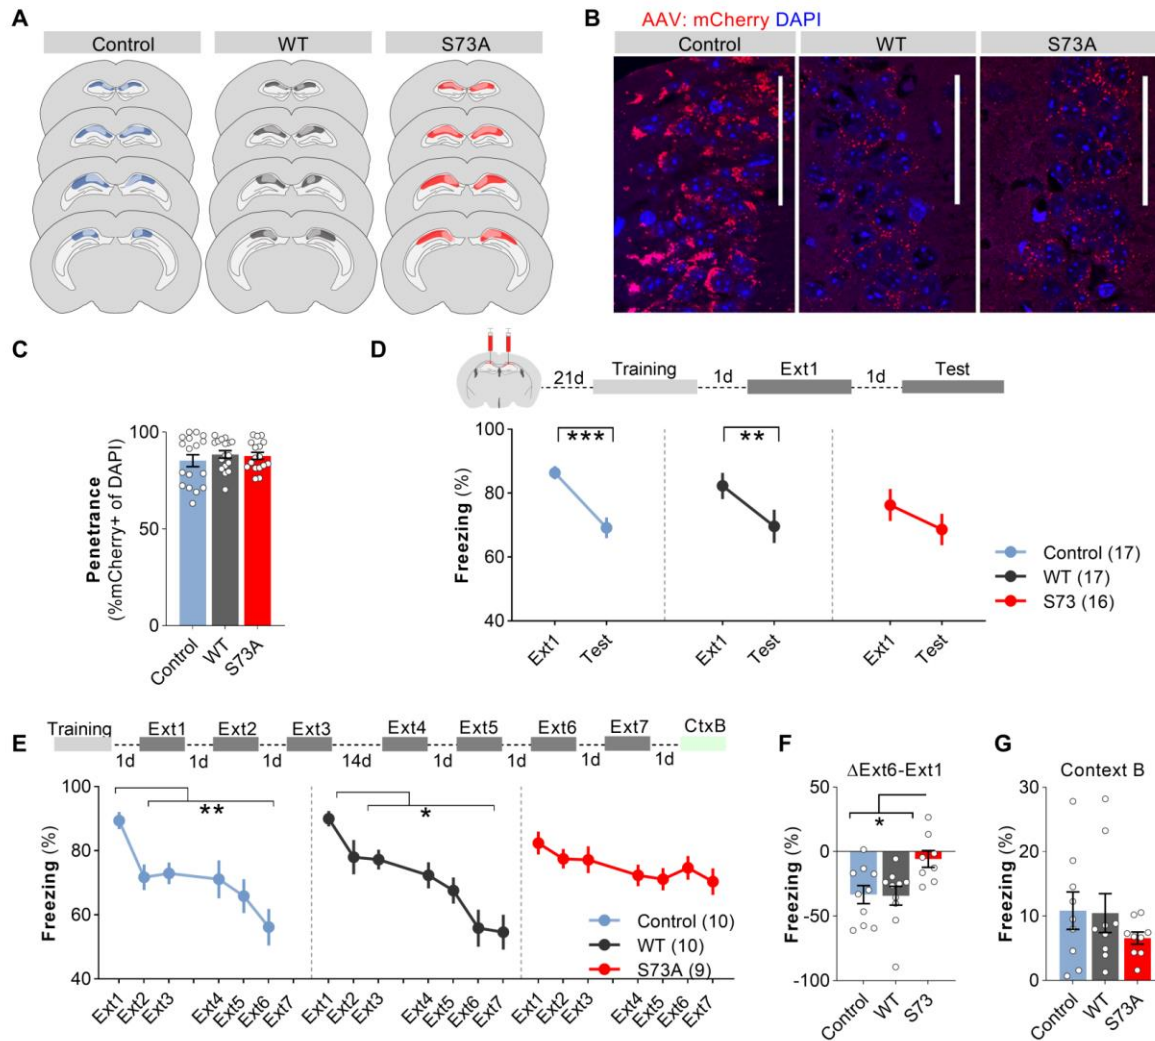

350  
 351 **Figure 4. Phosphorylation of PSD-95 at serine 73 is required for contextual fear extinction.** **A**,  
 352 Area and extent of viral infection shown. **B**, Single confocal scans of the stratum pyramidale of dCA1  
 353 of the mice expressing Control (n = 17), WT (n = 17) and S73A (n = 16) (scale bars, 50  $\mu$ m) and **(C)**  
 354 penetrance of the viruses. **D**, Experimental timeline and percentage of freezing during fear extinction  
 355 and consolidation of fear extinction memory test of the mice with dCA1-targeted expression of  
 356 Control, WT or S73A. **E-G**, Experimental timeline and percentage of freezing during extensive fear  
 357 extinction training of the mice with dCA1-targeted expression of Control (n=10), WT (n=10) or S73A  
 358 (n=9). **F**, Summary of data showing change of freezing levels during extensive fear extinction training,  
 359 as compared to the Ext1, and **(G)** the test of fear levels in the context B. \*P < 0.05; \*\*P < 0.01; \*\*\*P  
 360 < 0.001 by Tukey's multiple comparisons tests.

361

### 362 Effect of chemogenetic inhibition of dCA1 on fear extinction-induced expression of PSD-95.

363 Our data indicate that PSD-95(S73A) overexpression prevents extinction-induced upregulation of  
 364 PSD-95 and synaptic remodeling, as well as the extinction of fear memory. These observations  
 365 suggest that extinction-induced upregulation of PSD-95 is required to update an extinguished fear

366 memory. However, behavioral impairments induced by overexpression of S73A may result from the  
367 deregulation of PSD-95 levels at other time points of training. Accordingly, we asked whether the  
368 dCA1 activity, specifically during the first extinction session, is required for extinction-induced PSD-  
369 95 expression. Such findings would support the hypothesis that extinction-induced PSD-95 expression  
370 is required to extinguish fear memory.

371 To test this hypothesis we used chemogenetic tools to manipulate dCA1 activation during the  
372 fear extinction memory session and analysed extinction-induced PSD-95 expression. AAV1/2  
373 encoding inhibitory designer receptors exclusively activated by designer drugs (DREADD, hM4(Gi))  
374 under human synapsin (hSyn) promoter [AAV1:hSyn-hM4(Gi):mCherry (hM4)] (Roth, 2016), or a  
375 Control virus encoding mCherry (AAV1/2:CaMKII-mCherry) were bilaterally infused into the dCA1  
376 region of mice. The post-training analysis of the hippocampal sections confirmed that the expression  
377 of the viruses was limited to the dCA1 (Bregma > -2.5 mm) (**Figure 5A**). There were no significant  
378 differences in the virus penetration between the experimental groups [hM4 was expressed in 71% and  
379 80% of the pyramidal cells (in the saline and CNO groups, respectively); the Control virus was  
380 expressed in 84% and 87% of the cells (saline and CNO, respectively)] (**Figure 5B**). Both groups of  
381 the mice with hM4 virus showed low freezing levels at the beginning of the training session, and  
382 freezing increased after USs delivery (RM ANOVA, effect of time:  $F(1, 10) = 86.36$ ,  $P < 0.0001$ )  
383 (**Figure 5C**). The next day, mice received a systemic injection of saline or CNO (1 mg/kg), and 30  
384 minutes later, they were re-exposed to the training context. As in previous experiments, both groups of  
385 mice showed high levels of freezing at the beginning of the extinction session, which decreased  
386 throughout the session (effect of time:  $F(1, 11) = 8.149$ ,  $P = 0.016$ ), indicating within-session  
387 extinction. There was no effect of drug ( $F(3, 26) = 2.438$ ,  $P = 0.087$ ), or a training and drug interaction  
388 ( $F(3, 26) = 1.086$ ;  $P = 0.372$ ), on the freezing levels (**Figure 5C**). At the end of the 30-minute  
389 extinction session, the brains were collected and immunostained to detect PSD-95 protein (**Figure**  
390 **5D**). There was a significant effect of the drug ( $F(1, 16) = 31.06$ ,  $P < 0.0001$ ), but no effect of the CA1  
391 domain ( $F(2, 29) = 0.739$ ,  $P = 0.486$ ), on PSD-95 levels. *Post hoc* LSD tests for planned comparisons  
392 confirmed that the expression of PSD-95 was decreased in all strata of dCA1 in the CNO group,  
393 compared to the saline-treated animals ( $P < 0.05$  for all domains) (**Figure 5E**). To validate whether

394 this downregulation of PSD-95 expression was specific to the chemogenetic inhibition, we trained  
395 mice with the Control virus expressed in the dCA1 (**Figure 5F**). The animals were injected with CNO  
396 before the extinction session and sacrificed after the session (**Figure 5F**). As in the previous  
397 experiment, CNO did not affect memory recall or within-session fear extinction (effect of drug:  $F(3,$   
398  $27) = 1.628$ ,  $P = 0.206$ ). Moreover, there was no significant effect of the drug (RM ANOVA, effect of  
399 drug:  $F(1, 12) = 3.73$ ,  $P = 0.077$ ) or the region ( $F(1.302, 14.32) = 1.505$ ,  $P = 0.248$ ) on PSD-95  
400 expression levels (**Figure 5G-H**), indicating that CNO does not affect PSD-95 expression.

401 Since dendritic spines in dCA1 undergo constant remodeling (Attardo et al., 2015) the effect  
402 of the chemogenetic inhibition of dCA1 neurons on PSD-95 levels could be unrelated to the  
403 extinction-induced PSD-95 expression but results from decreased cell activity. To test this hypothesis  
404 we chemogenetically inhibited dCA1 neurons outside of the fear extinction time-window (7d after  
405 training) and measured the changes of PSD-95. Mice with bilateral expression of hM4 or the Control  
406 virus were systemically injected with saline or CNO (**Figure S5**). As in the extinction experiment, the  
407 brains were collected 60 minutes after the injection and immunostained for PSD-95. At this time point,  
408 no effect of the drug on PSD-95 levels was observed in the Control or hM4 groups (**Figure S5**). Thus,  
409 chemogenetic inhibition of dCA1 outside of the fear extinction memory window does not affect the  
410 levels of PSD-95.

411



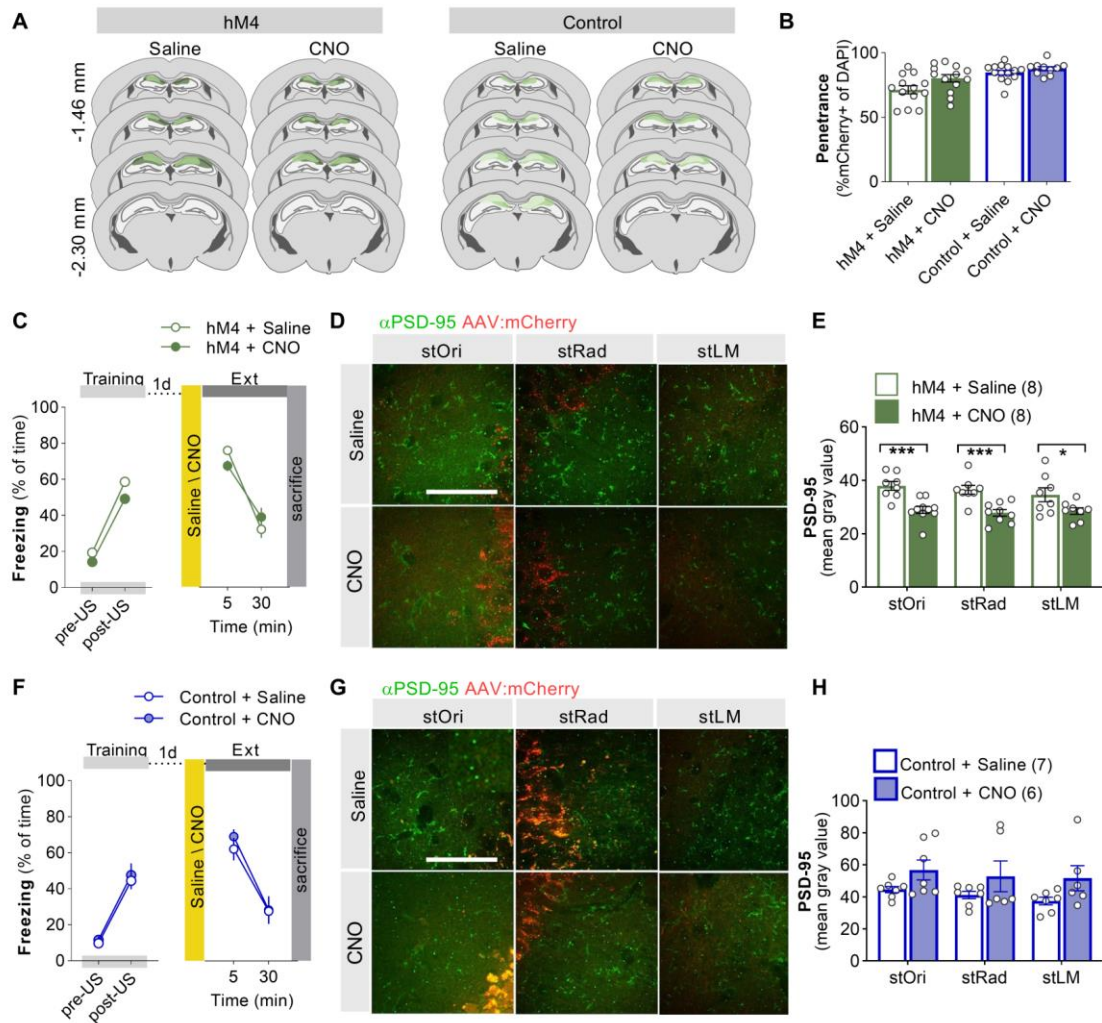

412  
 413 **Figure 5. Chemogenetic inhibition of dCA1 during extinction session impairs extinction-induced**  
 414 **PSD-95 expression.** Three weeks after bilateral dCA1 viral infusion surgery, mice were trained in fear  
 415 conditioning, followed by a fear extinction session 24 hours later. In all groups, saline or CNO was  
 416 systemically injected 30 minutes before the extinction session. Mice were sacrificed immediately after  
 417 the fear extinction session. **(A)** The extent of viral transfections in the CA1 area. **(B)** Penetrance of  
 418 hM4 virus and Control virus in dCA1 (mice, saline/CNO, hM4 = 8/8; Control = 7/6). **(C)** Experimental  
 419 timeline and percentage of freezing during fear conditioning and fear extinction session of the mice  
 420 with hM4 virus. **(D)** Representative, confocal scans of the brain slices immunostained for PSD-95 in  
 421 hM4 groups. Scale bar: 10  $\mu$ m. **(E)** Summary of data quantifying the expression of PSD-95 in three  
 422 domains of dCA1 of the mice with hM4 virus. **(F)** Experimental timeline and percentage of freezing  
 423 during fear conditioning and fear extinction session of the mice with the Control virus. **(G)**  
 424 Representative, confocal scans of the brain slices immunostained for PSD-95. Scale bar: 10  $\mu$ m. **(H)**  
 425 Summary of data quantifying the expression of PSD-95 in three domains of dCA1 of the mice with the  
 426 Control virus. \* $P < 0.05$ , \*\* $P < 0.01$ , \*\*\* $P < 0.001$ .

427

428

429 **The effect of chemogenetic inhibition of dCA1 area during fear extinction on updating an**  
430 **extinguished contextual fear memory.**

431 Our experiments showed that chemogenetic inhibition of dCA1 during extinction of contextual fear  
432 memory prevented the extinction-induced expression of PSD-95. Thus extinction-induced  
433 upregulation of PSD-95 levels in the dCA1 is a likely mechanism that enables extinction of contextual  
434 fear memory. To test this hypothesis, we again used chemogenetic tools. Mice were bilaterally  
435 injected in the dCA1 with AAV1/2 encoding hM4 or the Control virus, and they were trained 3 weeks  
436 later (**Figure 6A**). The post-training analysis of the hippocampal sections revealed that hM4 was  
437 expressed in 76% of the pyramidal cells of dCA1 (both in cell bodies and dendrites), while the Control  
438 virus in 84% of the cells (**Figure 6B, C**). The expression of the virus was limited to the dCA1  
439 (Bregma > -2.5 mm) (**Figure 6D**). Three weeks post-surgery and viral infection, mice underwent  
440 contextual fear conditioning. Twenty-four hours after training, mice received a systemic injection of  
441 saline or CNO (1 mg/kg) to activate hM4 receptors, and were re-exposed to the training context for  
442 contextual fear extinction (Ext) (**Figure 6E**). Mice in all groups showed high freezing levels at the  
443 beginning of Ext, indicating fear memory formation and no drug-induced impairment of memory  
444 recall (**Figure 6E**). We next tested fear extinction memory 24 hours later (Test). Only in the hM4  
445 group injected with saline, but not in the group injected with CNO, the freezing levels during the Test  
446 were lower as compared to Ext (RM ANOVA, effect of time:  $F(1, 32) = 11.22, P = 0.002$ , drug:  $F(1,$   
447  $32) = 0.112, P = 0.739$ ; LSD *post hoc* tests for planned comparisons, Saline:  $P < 0.001$ ; CNO:  $P =$   
448  $0.214$ ), indicating consolidation of fear extinction memory in the hM4+Saline group and impairment  
449 of fear extinction by chemogenetic inhibition of dCA1 (**Figure 6E**). In the Control virus groups, the  
450 freezing levels decreased during the Test as compared to Ext, and no effect of the drug was observed  
451 (effect of time:  $F(1, 24) = 24.2, P < 0.001$ ; drug:  $F(1, 24) = 1.29, P = 0.267$ ; LSD *post hoc* tests for  
452 planned comparisons, Saline:  $P < 0.001$ ; CNO:  $P = 0.005$ ) (**Figure 6F**). Thus, CNO alone did not  
453 impair consolidation of fear extinction memory. Therefore, we next asked whether chemogenetic  
454 manipulation of dCA1 outside (a day prior) the fear extinction memory session (Ext) impairs updating  
455 of the fear memory.



456           A new group of C57BL/6J mice were injected into dCA1 with AAV1/2 encoding hM4 and  
457 trained 3 weeks later (**Figure 6G**). The virus penetrance and area of the infection were similar to  
458 previous experiments. One day after training, all mice received a systemic injection of CNO (1 mg/kg)  
459 or Saline and were re-exposed to the training context 24 hours later for fear extinction (Ext). On the  
460 following day fear extinction memory was tested (Test). Mice from both groups showed high freezing  
461 levels at the beginning of Ext, and it was lower during Test as compared to Ext (RM ANOVA, effect  
462 of training:  $F(1, 14) = 270$ ,  $P < 0.0001$ ; drug:  $F(1, 15) = 0.134$ ,  $P = 0.719$ ; LSD *post hoc* tests for  
463 planned comparisons, Saline:  $P = 0.014$ ; CNO:  $P = 0.003$ ), indicating no impairment of fear memory  
464 recall and extinction (**Figure 6G**). Overall, our data indicate that chemogenetic inhibition of dCA1  
465 during the contextual fear extinction session does not affect fear memory recall but prevents extinction  
466 of the contextual fear memory leading to fear memory persistence.

467

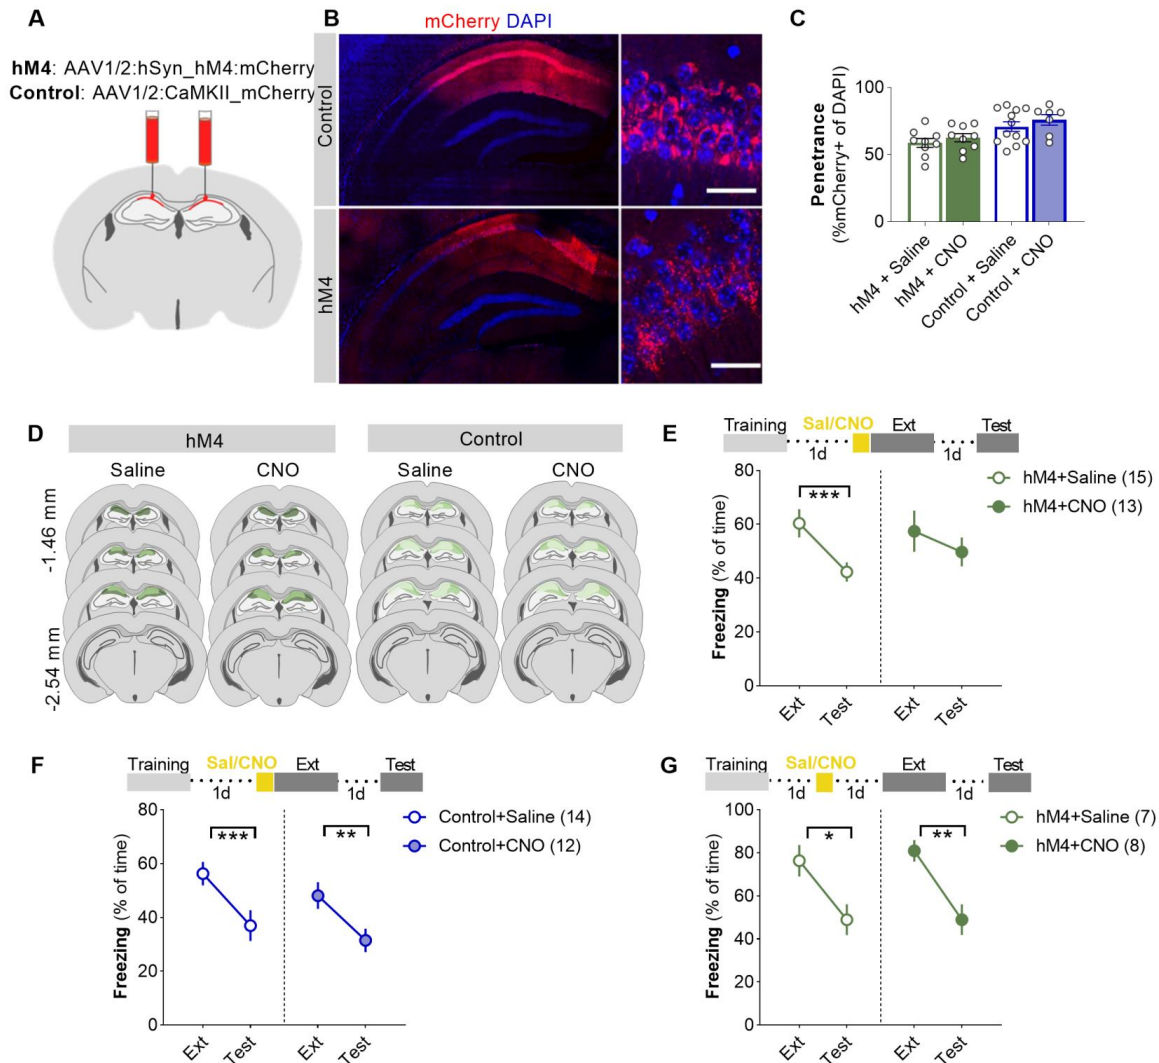

468

469 **Figure 6. Chemogenetic inhibition of dCA1 impairs extinction of contextual fear.** (A) AAV-hSyn-  
 470 hM4(Gi):mCherry (hM4) and Control virus (mCherry) were bilaterally injected into the dCA1 (left).  
 471 (B) Single confocal scans showing transfected dCA1. Viral expression was observed in cell bodies and  
 472 dendrites of pyramidal neurons. (right) Magnification of dCA1 confocal scans (Scale bars, 30  $\mu$ m). (C)  
 473 Penetrance of hM4 virus (n = 27 animals) and Control virus (n = 24 animals). (D) The extent of viral  
 474 transfections in the CA1 area. Minimum and maximum transfections are shown. (E-F) Experimental  
 475 design and percentage of freezing during fear extinction session (Ext) and consolidation of fear  
 476 extinction memory test (Test) of the mice with hM4 (E) and Control virus (F). Mice were trained three  
 477 weeks after the surgery for optimal virus expression. In all groups, saline or CNO (1mg/kg) was  
 478 systemically injected 30 minutes before Ext. (G) Experimental design and percentage of freezing  
 479 during fear extinction session (Ext) and Test of the mice with hM4 virus. Mice were trained three  
 480 weeks after the surgery and virus expression. CNO or Saline was systemically injected 24 hours before  
 481 extinction (Ext). \*\*\*P < 0.001, \*\*P < 0.01, \*P < 0.05 by LSD test for planned comparisons only, Ext  
 482 vs. Test. Numbers of trained mice are indicated in the legends.

483

## 484 DISCUSSION

485 Here, we have investigated synaptic processes in the dCA1 that contribute to contextual fear  
486 memory attenuation. Our interest in this problem stems from many anxiety disorders associated with  
487 impaired fear extinction and hippocampus function (van Rooij et al., 2018). The key findings from the  
488 present study are that (1) contextual fear extinction increases PSD-95 protein expression per dendritic  
489 spine in the dCA1 and is accompanied by remodeling of the glutamatergic synapses; (2) this  
490 extinction-induced PSD-95 expression and synaptic remodeling is regulated by phosphorylation of  
491 PSD-95 at serine 73; (3) PSD-95 phosphorylation at serine 73 in the dCA1 is required for extinction of  
492 fear memories but not for the fear memory consolidation or recall. Below, the significance of the  
493 findings is discussed in light of previous studies.

494 PSD-95 affects the structure and function of glutamatergic synapses. In particular, *in vitro*  
495 studies showed PSD-95 overexpression increases the size of glutamatergic synapses (Nikonenko et al.,  
496 2008). Our study is the first to show how overexpression of PSD-95 influences dCA1 glutamatergic  
497 synapses *in vivo*. We confirm that the overexpression of PSD-95 (both WT and S73A) increases the  
498 median areas of PSDs, and it also results in a loss of small dendritic spines. Thus, the structural  
499 consequences of PSD-95 overexpression *in vivo* are profound as they involve the global remodeling of  
500 the local circuit, but the long-term elimination and up-scaling of synapses are not regulated by PSD-95  
501 serine 73 phosphorylation as similar changes are observed in WT and S73A 5US groups, as compared  
502 to the Control 5US. Moreover, we demonstrate that contextual fear extinction induces rapid loss of  
503 synapses in the stOri that is accompanied by heterosynaptic upregulation of PSD-95 levels, growth of  
504 the synapses and increased synaptic transmission. Upregulation of PSD-95 levels during memory  
505 formation and recall was previously demonstrated in the hippocampus and cortex (Elkobi et al., 2008;  
506 Zanca et al., 2019). Here, it is likely that protein translation, degradation, translocation as well as the  
507 loss of small spines with low PSD-95 content contribute to the relative upregulation of PSD-95 levels  
508 per dendritic spine in the Ext group, as compared to 5US animals.

509           The synaptic processes induced by fear extinction allude to the Hebbian strengthening of  
510 activated synapses and heterosynaptic weakening of adjacent synapses observed in activated visual  
511 cortex neurons and *in vitro* (El-Boustani et al., 2018; Royer and Paré, 2003). Our study is the first  
512 description of bidirectional plasticity of dendritic spines in the dCA1 during attenuation of fear  
513 memories. Previously, the heterosynaptic weakening was shown to be driven by the expression of  
514 CaMKII-regulated Arc protein (El-Boustani et al., 2018). Here, we show that both aspects of the fear  
515 extinction-induced synaptic plasticity (spine elimination and growth of the remaining synapses) are  
516 coordinated by  $\alpha$ CaMKII-dependent phosphorylation of PSD-95 at serine 73 (Gardoni et al., 2006).  
517 This is a new function of PSD-95 serine 73 as previously it was shown to be required for: PSD-95  
518 dissociation from the NMDAR subunit NR2A after NMDAR stimulation (Gardoni et al., 2006), PSD-  
519 95 protein downregulation during LTD (Nowacka et al., 2020) and termination of synaptic growth  
520 after glutamate uncaging (Steiner et al., 2008). Thus none of these synaptic models explains synaptic  
521 processes observed during fear extinction as they predict excessive growth of the synapses and  
522 accumulation of PSD-95(S73A). The effects of S73A mutation can be explained assuming  
523 interdependence of bidirectional synaptic processes induced by fear extinction; for example, synaptic  
524 growth is only allowed if some synapses are eliminated (e.g. due to spatial constraints), and the later  
525 process is precluded due to stable PSD-95(S73A)-NMDAR interactions at PSD (Gardoni et al., 2006).  
526 The precise timing and location of dCA1 PSD-95(S73) phosphorylation and dissociation of PSD-95-  
527 NMDAR complex to enable PSD elimination during fear extinction has to be revealed in the future  
528 studies.

529           Our data indicate that the extinction of contextual fear induces the upregulation of PSD-95  
530 expression per dendritic in the stOri and stLM, while the protein levels in stRad are not changed.  
531 These alterations are accompanied by the increased median area of PSDs, indicating circuit  
532 remodeling in the distal strata of dendrites. As shown by the control experiments, the extinction-  
533 induced synaptic changes are transient (not observed 60 minutes after contextual fear extinction  
534 session), and absent in the animals exposed to neutral and known context (without USs experience  
535 during training) proving their specificity for fear extinction. Interestingly, chemogenetic inhibition of

536 dCA1 during fear extinction session downregulates PSD-95 also in stRad suggesting that, although the  
537 net changes of PSD-95 levels are not detected, these synapses also are remodelled but to lesser extent.  
538 Thus the extinction-induced synaptic change pattern is strikingly different from the changes observed  
539 immediately after contextual fear memory encoding where transient synaptogenesis is observed in the  
540 stRad (Radwanska et al., 2011). These observations support the idea that different CA1 inputs are  
541 involved in memory formation and extinction. CA3 neurons project to the stRad and stOri regions of  
542 CA1 pyramidal neurons, the nucleus reuniens (Re) projects to the stOri and stLM, and the entorhinal  
543 cortex (EC) projects to the stLM (Hoover and Vertes, 2012; Ishizuka et al., 1990; Kajiwara et al.,  
544 2008; Vertes et al., 2015). Thus, the pattern of synaptic changes induced by contextual fear extinction  
545 co-localises with the domains innervated by the Re and EC, suggesting that these inputs are regulated  
546 during contextual fear extinction. In agreement with our observations, previous data showed that the  
547 EC is activated during and required for contextual fear extinction in animal models (Baldi and  
548 Bucherelli, 2015, 2014; Bevilacqua et al., 2006). Human studies also showed that EC-CA1 projections  
549 are activated by cognitive prediction error (that may drive memory extinction), while CA3-CA1  
550 projections are activated by memory recall without prediction errors (Bein et al., 2020). The role of the  
551 Re in fear memory encoding, retrieval, extinction and generalisation has been demonstrated  
552 (Ramanathan et al., 2018; Troyner and Bertoglio, 2021; Xu and Sudhof, 2013). Still, it has to be  
553 established whether the plasticity of dCA1 synapses is specific to Re and/or EC projections.

554         The formation of spatial and contextual fear memories is thought to involve NMDA receptor-  
555 dependent synaptic plasticity in the dCA1 (Bliss and Collingridge, 1993; Lisman et al., 2017; Martin  
556 et al., 2000). However, more recent dCA1-targeted genetic manipulation studies have shown that mice  
557 with dCA1 knockout of NMDA receptor (NMDAR) subunit, NR1, have an intact formation of spatial  
558 and contextual fear memories (Bannerman et al., 2012; Hirsch et al., 2015). However, NMDAR-  
559 dependent synaptic transmission is required for spatial choice (Bannerman et al., 2012) and contextual  
560 fear extinction (Hirsch et al., 2015). Accordingly, it has been proposed that NMDAR-dependent  
561 plasticity in the dCA1 has a crucial role in detecting and resolving contradictory or ambiguous  
562 memories when spatial information is required (Bannerman et al., 2014). For example, dCA1

563 NMDAR-dependent plasticity would be required during extinction training of contextual fear  
564 memories, in which an animal recalls aversive memories of the context (or cues) and experiences a  
565 conflicting new experience of the same context being safe. This is consistent with comparator views of  
566 hippocampal function (Gray, 1982; Grossberg and Merrill, 1992) and the fact that hippocampus  
567 processes surprising events such as novelty and prediction errors (Bein et al., 2020; Huh et al., 2009;  
568 Kumaran and Maguire, 2006; Ploghaus et al., 2000). In agreement with this theory, our experiments  
569 are the first to show that dCA1-targeted genetic manipulation blocking the phosphorylation of PSD-95  
570 at serine 73, and chemogenetic inhibition during the fear extinction session, prevents fear extinction-  
571 induced dCA1 synaptic remodeling and extinction of contextual fear even after extensive extinction  
572 training. dCA1 PSD-95(S73A) mutation impairs extinction not only of recent (1-day old) but also  
573 remote (14-day old) contextual fear memory. We also show that dCA1 PSD-95(S73A) mutation does  
574 not affect mice activity, context-independent fear generalisation or fear recovery after 14-day delay.  
575 Thus our data support the hypothesis that PSD-95(S73)-dependent synaptic plasticity of the dCA1 is  
576 necessary to resolve conflicting pieces of information about the fear-associated context, and this refers  
577 to contextual information independent of its age and extent of novel and conflicting experience  
578 exposure. In agreement with our findings, Cai with collaborators (2018) and Li with collaborators  
579 (2017) show that the signaling pathways downstream of NMDAR-PSD-95 complex in the dorsal CA3  
580 and DG are involved in contextual fear extinction. In particular, translocation of PSD-95 from  
581 NMDAR to TrkB, and increased PSD-95-TrkB interactions, promotes extinction, while competing  
582 NMDAR-PSD-95-nNOS interactions hinder contextual fear extinction by inhibiting ERK signalling  
583 (Cai et al., 2018) that is required for fear extinction (Tronson et al., 2009). Accordingly, PSD-  
584 95(S73A) mutation, that hampers dissociation of PSD-95 from NMDAR (Gardoni et al., 2006), may  
585 limit interactions of PSD-95 with TrkB, and therefore obstruct fear extinction. This adds up to  
586 previous studies investigating the molecular processes in dCA1, including activation of ERK, CB1,  
587 and CBEP, that are required for contextual fear extinction, but not fear memory consolidation (Berger-  
588 Sweeney et al., 2006; Bitencourt et al., 2008; de Oliveira Alvares et al., 2008; Pamplona et al., 2008;  
589 Radulovic and Tronson, 2010; Tronson et al., 2009). Interestingly, other processes, such as protein  
590 synthesis and c-Fos expression, are necessary for contextual fear consolidation and reconsolidation,



591 but not extinction (Fischer, 2004; Lattal and Abel, 2004; Mamiya et al., 2009; Tronson et al., 2009).  
592 Thus, it remains puzzling how synaptic plasticity, without concomitant translation, contributes to  
593 contextual fear extinction.

594 In our study the local genetic and chemogenetic manipulations tend to decrease contextual fear  
595 memory retrieval (Ext1). However, the differences between the experimental groups never reach  
596 statistical significance. This observation is in agreement with a previous report (Hirsch et al., 2015),  
597 but contradicts other studies which found that genetic, optogenetic or excitotoxic inactivation of dCA  
598 prevents recall of contextual fear memory (Ji and Maren, 2008; Nagura et al., 2012; Sakaguchi et al.,  
599 2015). The methodological differences between ours and previous studies may explain discrepant  
600 results. Sakaguchi et al. (2015) used optogenetic stimulation of dCA1 in  $\alpha$ -CaMKII-tTA  $\times$  TetO-  
601 ArchT-GFP mice that expressed ArchT not only in the dCA1 neurons but also neurons that project to  
602 dCA1. Firstly, optogenetic inhibition affects not only synaptic transmission but also cell excitability.  
603 Secondly, we used more intensive behavioural training (5US vs 1 US), that results in memory which is  
604 more resistant to disruption (Irvine et al., 2005; Radwanska et al., 2011). Ji and Maren (2008) used  
605 excitotoxic inactivation of dCA1 and investigated cued fear conditioning and fear extinction to the  
606 cue. Thus context is only the background in their study and it may differently involve dCA1 synaptic  
607 plasticity than context used as a foreground factor. Furthermore, excitotoxic lesion, as optogenetic  
608 inhibition, affects not only synapses but also cell activity. Finally, Nagura and colleagues (2012) used  
609 ligand binding-deficient PSD-95 cDNA knockin (KI) mice and observed enhanced contextual fear  
610 memory formation and impaired long-term memory retention as in the following study (Fitzgerald et  
611 al., 2015). However, even though the behavioral phenotype was supported by ephys data showing  
612 impaired LTP in dCA1, it is unknown whether it really relies on CA1 plasticity. Thus, the analysed  
613 literature and our results support the notion that dCA1 synaptic plasticity is involved in contextual fear  
614 memory extinction, but it is not necessary for contextual fear memory retrieval. In particular,  
615 phosphorylation of PSD-95(S73) is not critical for fear memory formation and expression. As earlier  
616 EM studies show, contextual fear memory formation involves transient (< 24 hr) synaptogenesis in  
617 dCA1 (Radwanska et al., 2011), while here we demonstrate that contextual fear memory extinction



618 involves elimination of dendritic spines and parallel growth of the remaining synapses (both of these  
619 phenomena being impaired by S73A mutation). Accordingly, we can propose that memory formation  
620 and simple synaptic strengthening (that is not coupled with dendritic spine elimination) are  
621 independent of PSD-95(S73), as previously shown (Steiner et al., 2008). However PSD-95(S73) is  
622 required for fear extinction and bidirectional plasticity induced in dCA1 during fear extinction.

## 623 **Conclusions**

624 Our study pinpoints a cellular mechanism that operates in the dCA1 area and contributes to  
625 contextual fear memory attenuation. We propose that the propensity for extinction of contextual fear  
626 memories relies on opposing synaptic processes: strengthening of synapses and rapid elimination of  
627 small dendritic spines, that both require PSD-95 serine 73 phosphorylation. Since new or long-lasting  
628 memories may be repeatedly reorganized upon recall (Nader et al., 2000; Schafe et al., 2001), the  
629 molecular and cellular mechanisms involved in extinction of the existing fearful memories provide  
630 excellent targets for fear memory impairment therapies. In particular, understanding the mechanisms  
631 that underlie contextual fear extinction may be relevant for post-traumatic stress disorder treatment.

632

## 633 **Acknowledgments, Funding and Disclosure**

634 This work was supported by a National Science Centre (Poland) Grant No. 2015/19/B/NZ4/02996 and  
635 2013/08/W/NZ4/00861 to KR. PRELUDIUM Grant No. 2016/21/N/NZ4/03304 to MZ and  
636 PRELUDIUM Grant No. 2015/19/N/NZ4/03611 to KŁ. TW was supported by the National Science  
637 Centre (Poland) (Grant No. 2017/26/E/NZ4/00637). The project was carried out using CePT  
638 infrastructure financed by the European Union - The European Regional Development Fund within the  
639 Operational Program "Innovative economy" for 2007-2013.

640

641 MZ, MB, KFT and KR designed the experiments; MZ, MB, MNS, MR, AN, AC, KTF, AS, KŁ, TW  
642 and MŚ performed the experiments; MZ, MB, ES, MŚ, MR, KŁ, KFT, TB, JW and KR analyzed data.  
643 MZ, MB and KR drafted the manuscript. All authors had critical input to the final version of the

644 manuscript. Authors report no financial interests or conflicts of interest. Light and microscopy  
645 experiments were performed at the Laboratory of Imaging Tissue Structure and Functions.

646

## 647 **MATERIALS AND METHODS**

648 A full description of Materials and Methods are available in supplementary material online.

### 649 *Animals*

650 C57BL/6J and Thy1-GFP(M) (Feng et al., 2009b) mice were used in the experiments. The  
651 experiments were undertaken in accordance with the Animal Protection Act of Poland and approved  
652 by the I Local Ethics Committee (261/2012, Warsaw, Poland).

### 653 *Contextual fear conditioning*

654 The animals were trained in a conditioning chamber (Med Associates Inc, St Albans, USA) in  
655 a soundproof box. Mice were placed in the training chamber, and after a 148 s introductory period, a  
656 foot shock (2 s, 0.7 mA) was presented. The shock was repeated 5 times at 90 s inter-trial intervals.  
657 Contextual fear memory was tested and extinguished 24 h after training by re-exposing mice to the  
658 conditioning chamber for 30 minutes without US presentation, followed by a second 30-minute  
659 extinction session the following day. Freezing and locomotor activity of mice was automatically  
660 scored. In all experiments, experimenters were blind to the experimental groups.

661

662

663 **REFERENCES**

- 664 Abraham WC, Jones OD, Glanzman DL. 2019. Is plasticity of synapses the mechanism of long-term  
665 memory storage? *Npj Sci Learn* **4**:9. doi:10.1038/s41539-019-0048-y
- 666 Aziz W, Kraev I, Mizuno K, Kirby A, Fang T, Rupawala H, Kasbi K, Rothe S, Jozsa F, Rosenblum K,  
667 Stewart MG, Giese KP. 2019. Multi-input Synapses, but Not LTP-Strengthened Synapses,  
668 Correlate with Hippocampal Memory Storage in Aged Mice. *Curr Biol* **29**:3600-3610.e4.  
669 doi:10.1016/j.cub.2019.08.064
- 670 Baldi E, Bucherelli C. 2015. Brain sites involved in fear memory reconsolidation and extinction of  
671 rodents. *Neurosci Biobehav Rev* **53**:160–190. doi:10.1016/j.neubiorev.2015.04.003
- 672 Baldi E, Bucherelli C. 2014. Entorhinal cortex contribution to contextual fear conditioning extinction  
673 and reconsolidation in rats. *Neurobiol Learn Mem* **110**:64–71. doi:10.1016/j.nlm.2014.02.004
- 674 Bannerman DM, Bus T, Taylor A, Sanderson DJ, Schwarz I, Jensen V, Hvalby Ø, Rawlins JNP,  
675 Seeburg PH, Sprengel R. 2012. Dissecting spatial knowledge from spatial choice by  
676 hippocampal NMDA receptor deletion. *Nat Neurosci* **15**:1153–1159. doi:10.1038/nn.3166
- 677 Bannerman DM, Sprengel R, Sanderson DJ, McHugh SB, Rawlins JNP, Monyer H, Seeburg PH.  
678 2014. Hippocampal synaptic plasticity, spatial memory and anxiety. *Nat Rev Neurosci*  
679 **15**:181–192. doi:10.1038/nrn3677
- 680 Bats C, Groc L, Choquet D. 2007. The Interaction between Stargazin and PSD-95 Regulates AMPA  
681 Receptor Surface Trafficking. *Neuron* **53**:719–734. doi:10.1016/j.neuron.2007.01.030
- 682 Bein O, Duncan K, Davachi L. 2020. Mnemonic prediction errors bias hippocampal states. *Nat*  
683 *Commun* **11**:3451. doi:10.1038/s41467-020-17287-1
- 684 Béïque J, Andrade R. 2003. PSD-95 regulates synaptic transmission and plasticity in rat cerebral  
685 cortex. *J Physiol* **546**:859–867. doi:10.1113/jphysiol.2002.031369
- 686 Berger-Sweeney J, Zearfoss NR, Richter JD. 2006. Reduced extinction of hippocampal-dependent  
687 memories in CPEB knockout mice. *Learn Mem Cold Spring Harb N* **13**:4–7.  
688 doi:10.1101/lm.73706
- 689 Bevilacqua L, Bonini J, Rossato J, Izquierdo L, Cammarota M, Izquierdo I. 2006. The entorhinal cortex

- 690 plays a role in extinction. *Neurobiol Learn Mem* **85**:192–197. doi:10.1016/j.nlm.2005.10.001
- 691 Bitencourt RM, Pamplona FA, Takahashi RN. 2008. Facilitation of contextual fear memory extinction  
692 and anti-anxiogenic effects of AM404 and cannabidiol in conditioned rats. *Eur*  
693 *Neuropsychopharmacol J Eur Coll Neuropsychopharmacol* **18**:849–859.  
694 doi:10.1016/j.euroneuro.2008.07.001
- 695 Bliss TVP, Collingridge GL. 1993. A synaptic model of memory: long-term potentiation in the  
696 hippocampus. *Nature* **361**:31–39. doi:10.1038/361031a0
- 697 Cai C-Y, Chen C, Zhou Y, Han Z, Qin C, Cao B, Tao Y, Bian X-L, Lin Y-H, Chang L, Wu H-Y, Luo  
698 C-X, Zhu D-Y. 2018. PSD-95-nNOS Coupling Regulates Contextual Fear Extinction in the  
699 Dorsal CA3. *Sci Rep* **8**:12775. doi:10.1038/s41598-018-30899-4
- 700 Chen X, Nelson CD, Li X, Winters CA, Azzam R, Sousa AA, Leapman RD, Gainer H, Sheng M,  
701 Reese TS. 2011. PSD-95 Is Required to Sustain the Molecular Organization of the  
702 Postsynaptic Density. *J Neurosci* **31**:6329–6338. doi:10.1523/JNEUROSCI.5968-10.2011
- 703 Cheng D, Hoogenraad CC, Rush J, Ramm E, Schlager MA, Duong DM, Xu P, Wijayawardana SR,  
704 Hanfelt J, Nakagawa T, Sheng M, Peng J. 2006. Relative and absolute quantification of  
705 postsynaptic density proteome isolated from rat forebrain and cerebellum. *Mol Cell*  
706 *Proteomics MCP* **5**:1158–1170. doi:10.1074/mcp.D500009-MCP200
- 707 Chetkovich DM, Bunn RC, Kuo S-H, Kawasaki Y, Kohwi M, Brecht DS. 2002. Postsynaptic targeting  
708 of alternative postsynaptic density-95 isoforms by distinct mechanisms. *J Neurosci Off J Soc*  
709 *Neurosci* **22**:6415–6425. doi:20026598
- 710 de Oliveira Alvares L, Pasqualini Genro B, Diehl F, Molina VA, Quillfeldt JA. 2008. Opposite action  
711 of hippocampal CB1 receptors in memory reconsolidation and extinction. *Neuroscience*  
712 **154**:1648–1655. doi:10.1016/j.neuroscience.2008.05.005
- 713 Denk W, Horstmann H. 2004. Serial Block-Face Scanning Electron Microscopy to Reconstruct Three-  
714 Dimensional Tissue Nanostructure. *PLoS Biol* **2**. doi:10.1371/journal.pbio.0020329
- 715 Ehrlich I, Klein M, Rumpel S, Malinow R. 2007. PSD-95 is required for activity-driven synapse  
716 stabilization. *Proc Natl Acad Sci* **104**:4176–4181. doi:10.1073/pnas.0609307104
- 717 Ehrlich I, Malinow R. 2004. Postsynaptic Density 95 controls AMPA Receptor Incorporation during

- 718 Long-Term Potentiation and Experience-Driven Synaptic Plasticity. *J Neurosci* **24**:916–927.
- 719 El-Boustani S, Ip JPK, Breton-Provencher V, Knott GW, Okuno H, Bito H, Sur M. 2018. Locally  
720 coordinated synaptic plasticity of visual cortex neurons in vivo. *Science* **360**:1349–1354.  
721 doi:10.1126/science.aao0862
- 722 El-Husseini AE, Schnell E, Chetkovich DM, Nicoll RA, Brecht DS. 2000. PSD-95 involvement in  
723 maturation of excitatory synapses. *Science* **290**:1364–1368.
- 724 Elkobi A, Ehrlich I, Belelovsky K, Barki-Harrington L, Rosenblum K. 2008. ERK-dependent PSD-95  
725 induction in the gustatory cortex is necessary for taste learning, but not retrieval. *Nat Neurosci*  
726 **11**:1149–1151. doi:10.1038/nn.2190
- 727 Feng G, Mellor RH, Bernstein M, Keller-Peck C, Nguyen QT, Wallace M, Nerbonne JM, Lichtman  
728 JW, Sanes JR. 2000. Imaging Neuronal Subsets in Transgenic Mice Expressing Multiple  
729 Spectral Variants of GFP. *Neuron* **28**:41–51. doi:10.1016/S0896-6273(00)00084-2
- 730 Fischer A. 2004. Distinct Roles of Hippocampal De Novo Protein Synthesis and Actin Rearrangement  
731 in Extinction of Contextual Fear. *J Neurosci* **24**:1962–1966. doi:10.1523/JNEUROSCI.5112-  
732 03.2004
- 733 Fitzgerald PJ, Pinard CR, Camp MC, Feyder M, Sah A, Bergstrom HC, Graybeal C, Liu Y, Schlüter  
734 OM, Grant SG, Singewald N, Xu W, Holmes A. 2015. Durable fear memories require PSD-  
735 95. *Mol Psychiatry* **20**:901–912. doi:10.1038/mp.2014.161
- 736 Frankland PW, Bontempi B. 2005. The organization of recent and remote memories. *Nat Rev Neurosci*  
737 **6**:119–130. doi:10.1038/nrn1607
- 738 Gardoni F, Polli F, Cattabeni F, Di Luca M. 2006. Calcium-calmodulin-dependent protein kinase II  
739 phosphorylation modulates PSD-95 binding to NMDA receptors. *Eur J Neurosci* **24**:2694–  
740 2704. doi:10.1111/j.1460-9568.2006.05140.x
- 741 Garín-Aguilar ME, Díaz-Cintra S, Quirarte GL, Aguilar-Vázquez A, Medina AC, Prado-Alcalá RA.  
742 2012. Extinction procedure induces pruning of dendritic spines in CA1 hippocampal field  
743 depending on strength of training in rats. *Front Behav Neurosci* **6**.  
744 doi:10.3389/fnbeh.2012.00012
- 745 Gray JA. 1982. The neuropsychology of anxiety: An enquiry into the functions of the septo-

- 746 hippocampal system. *Behav Brain Sci* **5**:469–484. doi:10.1017/S0140525X00013066
- 747 Grossberg S, Merrill JW. 1992. A neural network model of adaptively timed reinforcement learning  
748 and hippocampal dynamics. *Brain Res Cogn Brain Res* **1**:3–38. doi:10.1016/0926-  
749 6410(92)90003-a
- 750 Hirsch SJ, Regmi NL, Birnbaum SG, Greene RW. 2015. CA1-specific deletion of NMDA receptors  
751 induces abnormal renewal of a learned fear response. *Hippocampus* **25**:1374–1379.  
752 doi:10.1002/hipo.22457
- 753 Hoover WB, Vertes RP. 2012. Collateral projections from nucleus reuniens of thalamus to  
754 hippocampus and medial prefrontal cortex in the rat: a single and double retrograde  
755 fluorescent labeling study. *Brain Struct Funct* **217**:191–209. doi:10.1007/s00429-011-0345-6
- 756 Huh KH, Guzman YF, Tronson NC, Guedea AL, Gao C, Radulovic J. 2009. Hippocampal Erk  
757 mechanisms linking prediction error to fear extinction: Roles of shock expectancy and  
758 contextual aversive valence. *Learn Mem* **16**:273–278. doi:10.1101/lm.1240109
- 759 Irvine EE, Vernon J, Giese KP. 2005.  $\alpha$ CaMKII autophosphorylation contributes to rapid learning but  
760 is not necessary for memory. *Nat Neurosci* **8**:411–412. doi:10.1038/nn1431
- 761 Ishizuka N, Weber J, Amaral DG. 1990. Organization of intrahippocampal projections originating  
762 from CA3 pyramidal cells in the rat. *J Comp Neurol* **295**:580–623.  
763 doi:10.1002/cne.902950407
- 764 Ji J, Maren S. 2008. Differential roles for hippocampal areas CA1 and CA3 in the contextual encoding  
765 and retrieval of extinguished fear. *Learn Mem* **15**:244–251. doi:10.1101/lm.794808
- 766 Kajiwara R, Wouterlood FG, Sah A, Boekel AJ, Baks-te Bulte LTG, Witter MP. 2008. Convergence  
767 of entorhinal and CA3 inputs onto pyramidal neurons and interneurons in hippocampal area  
768 CA1—An anatomical study in the rat. *Hippocampus* **18**:266–280. doi:10.1002/hipo.20385
- 769 Kornau HC, Schenker LT, Kennedy MB, Seeburg PH. 1995. Domain interaction between NMDA  
770 receptor subunits and the postsynaptic density protein PSD-95. *Science* **269**:1737–1740.  
771 doi:10.1126/science.7569905
- 772 Kumaran D, Maguire EA. 2006. An unexpected sequence of events: mismatch detection in the human  
773 hippocampus. *PLoS Biol* **4**:e424. doi:10.1371/journal.pbio.0040424

- 774 Lattal KM, Abel T. 2004. Behavioral impairments caused by injections of the protein synthesis  
775 inhibitor anisomycin after contextual retrieval reverse with time. *Proc Natl Acad Sci U S A*  
776 **101**:4667–4672. doi:10.1073/pnas.0306546101
- 777 Li J, Han Z, Cao B, Cai C-Y, Lin Y-H, Li F, Wu H-Y, Chang L, Luo C-X, Zhu D-Y. 2017. Disrupting  
778 nNOS-PSD-95 coupling in the hippocampal dentate gyrus promotes extinction memory  
779 retrieval. *Biochem Biophys Res Commun* **493**:862–868. doi:10.1016/j.bbrc.2017.09.003
- 780 Lisman J, Buzsáki G, Eichenbaum H, Nadel L, Ranganath C, Redish AD. 2017. Viewpoints: how the  
781 hippocampus contributes to memory, navigation and cognition. *Nat Neurosci* **20**:1434–1447.  
782 doi:10.1038/nn.4661
- 783 Mahmmoud RR, Sase S, Aher YD, Sase A, Gröger M, Mokhtar M, Höger H, Lubec G. 2015. Spatial  
784 and Working Memory Is Linked to Spine Density and Mushroom Spines. *PLOS ONE*  
785 **10**:e0139739. doi:10.1371/journal.pone.0139739
- 786 Mamiya N, Fukushima H, Suzuki A, Matsuyama Z, Homma S, Frankland PW, Kida S. 2009. Brain  
787 Region-Specific Gene Expression Activation Required for Reconsolidation and Extinction of  
788 Contextual Fear Memory. *J Neurosci* **29**:402–413. doi:10.1523/JNEUROSCI.4639-08.2009
- 789 Martin SJ, Grimwood PD, Morris RGM. 2000. Synaptic Plasticity and Memory: An Evaluation of the  
790 Hypothesis. *Annu Rev Neurosci* **23**:649–711. doi:10.1146/annurev.neuro.23.1.649
- 791 Migaud M, Charlesworth P, Dempster M, Webster LC, Watabe AM, Makhinson M, He Y, Ramsay  
792 MF, Morris RGM, Morrison JH, O'Dell TJ, Grant SGN. 1998. Enhanced long-term  
793 potentiation and impaired learning in mice with mutant postsynaptic density-95 protein.  
794 *Nature* **396**:433–439. doi:10.1038/24790
- 795 Morris RGM, Moser EI, Riedel G, Martin SJ, Sandin J, Day M, O'Carroll C. 2003. Elements of a  
796 neurobiological theory of the hippocampus: the role of activity-dependent synaptic plasticity  
797 in memory. *Philos Trans R Soc Lond B Biol Sci* **358**:773–786. doi:10.1098/rstb.2002.1264
- 798 Nader K, Schafe GE, Le Doux JE. 2000. Fear memories require protein synthesis in the amygdala for  
799 reconsolidation after retrieval. *Nature* **406**:722–726. doi:10.1038/35021052
- 800 Nagura H, Ishikawa Y, Kobayashi K, Takao K, Tanaka T, Nishikawa K, Tamura H, Shiosaka S,  
801 Suzuki H, Miyakawa T, Fujiyoshi Y, Doi T. 2012. Impaired synaptic clustering of



802 postsynaptic density proteins and altered signal transmission in hippocampal neurons, and  
803 disrupted learning behavior in PDZ1 and PDZ2 ligand binding-deficient PSD-95 knockin  
804 mice. *Mol Brain* **5**:43. doi:10.1186/1756-6606-5-43

805 Neves G, Cooke SF, Bliss TVP. 2008. Synaptic plasticity, memory and the hippocampus: a neural  
806 network approach to causality. *Nat Rev Neurosci* **9**:65–75. doi:10.1038/nrn2303

807 Nikonenko I, Boda B, Steen S, Knott G, Welker E, Muller D. 2008. PSD-95 promotes synaptogenesis  
808 and multiinnervated spine formation through nitric oxide signaling. *J Cell Biol* **183**:1115–  
809 1127. doi:10.1083/jcb.200805132

810 Nowacka A, Borczyk M, Salamian A, Wójtowicz T, Włodarczyk J, Radwanska K. 2020. PSD-95  
811 Serine 73 phosphorylation is not required for induction of NMDA-LTD. *Sci Rep* **10**:2054.  
812 doi:10.1038/s41598-020-58989-2

813 Pamplona FA, Bitencourt RM, Takahashi RN. 2008. Short- and long-term effects of cannabinoids on  
814 the extinction of contextual fear memory in rats. *Neurobiol Learn Mem* **90**:290–293.  
815 doi:10.1016/j.nlm.2008.04.003

816 Ploghaus A, Tracey I, Clare S, Gati JS, Rawlins JN, Matthews PM. 2000. Learning about pain: the  
817 neural substrate of the prediction error for aversive events. *Proc Natl Acad Sci U S A* **97**:9281–  
818 9286. doi:10.1073/pnas.160266497

819 Radulovic J, Tronson NC. 2010. Molecular Specificity of Multiple Hippocampal Processes Governing  
820 Fear Extinction. *Rev Neurosci* **21**:1–18. doi:10.1515/REVNEURO.2010.21.1.1

821 Radwanska K, Medvedev NI, Pereira GS, Engmann O, Thiede N, Moraes MFD, Villers A, Irvine EE,  
822 Maunganidze NS, Pyza EM, Ris L, Szymańska M, Lipiński M, Kaczmarek L, Stewart MG,  
823 Giese KP. 2011. Mechanism for long-term memory formation when synaptic strengthening is  
824 impaired. *Proc Natl Acad Sci U S A* **108**:18471–18475. doi:10.1073/pnas.1109680108

825 Ramanathan KR, Jin J, Giustino TF, Payne MR, Maren S. 2018. Prefrontal projections to the thalamic  
826 nucleus reuniens mediate fear extinction. *Nat Commun* **9**:4527. doi:10.1038/s41467-018-  
827 06970-z

828 Restivo L, Vetere G, Bontempi B, Ammassari-Teule M. 2009. The Formation of Recent and Remote  
829 Memory Is Associated with Time-Dependent Formation of Dendritic Spines in the

- 830 Hippocampus and Anterior Cingulate Cortex. *J Neurosci* **29**:8206–8214.  
831 doi:10.1523/JNEUROSCI.0966-09.2009
- 832 Roth BL. 2016. DREADDs for Neuroscientists. *Neuron* **89**:683–694.  
833 doi:10.1016/j.neuron.2016.01.040
- 834 Royer S, Paré D. 2003. Conservation of total synaptic weight through balanced synaptic depression  
835 and potentiation. *Nature* **422**:518–522. doi:10.1038/nature01530
- 836 Sakaguchi M, Kim K, Yu LMY, Hashikawa Y, Sekine Y, Okumura Y, Kawano M, Hayashi M,  
837 Kumar D, Boyden ES, McHugh TJ, Hayashi Y. 2015. Inhibiting the Activity of CA1  
838 Hippocampal Neurons Prevents the Recall of Contextual Fear Memory in Inducible ArchT  
839 Transgenic Mice. *PLOS ONE* **11**.
- 840 Schafe GE, Nader K, Blair HT, LeDoux JE. 2001. Memory consolidation of Pavlovian fear  
841 conditioning: a cellular and molecular perspective. *Trends Neurosci* **24**:540–546.  
842 doi:10.1016/S0166-2236(00)01969-X
- 843 Schnell E, Sizemore M, Karimzadegan S, Chen L, Brecht DS, Nicoll RA. 2002. Direct interactions  
844 between PSD-95 and stargazin control synaptic AMPA receptor number. *Proc Natl Acad Sci*  
845 *U S A* **99**:13902–13907. doi:10.1073/pnas.172511199
- 846 Schuette PJ, Reis FMCV, Maesta-Pereira S, Chakerian M, Torossian A, Blair GJ, Wang W, Blair HT,  
847 Fanselow MS, Kao JC, Adhikari A. 2020. Long-Term Characterization of Hippocampal  
848 Remapping during Contextual Fear Acquisition and Extinction. *J Neurosci* **40**:8329–8342.  
849 doi:10.1523/JNEUROSCI.1022-20.2020
- 850 Stansley BJ, Fisher NM, Gogliotti RG, Lindsley CW, Conn PJ, Niswender CM. 2018. Contextual Fear  
851 Extinction Induces Hippocampal Metaplasticity Mediated by Metabotropic Glutamate  
852 Receptor 5. *Cereb Cortex* **28**:4291–4304. doi:10.1093/cercor/bhx282
- 853 Stein V, House DRC, Brecht DS, Nicoll RA. 2003. Postsynaptic Density-95 Mimics and Occludes  
854 Hippocampal Long-Term Potentiation and Enhances Long-Term Depression. *J Neurosci*  
855 **23**:5503–5506. doi:10.1523/JNEUROSCI.23-13-05503.2003
- 856 Steiner P, Higley MJ, Xu W, Czervionke BL, Malenka RC, Sabatini BL. 2008. Destabilization of the  
857 Postsynaptic Density by PSD-95 Serine 73 Phosphorylation Inhibits Spine Growth and

- 858           Synaptic Plasticity. *Neuron* **60**:788–802. doi:10.1016/j.neuron.2008.10.014
- 859   Sturgill JF, Steiner P, Czervionke BL, Sabatini BL. 2009. Distinct Domains within PSD-95 Mediate  
860           Synaptic Incorporation, Stabilization, and Activity-Dependent Trafficking. *J Neurosci*  
861           **29**:12845–12854. doi:10.1523/JNEUROSCI.1841-09.2009
- 862   Taft CE, Turrigiano GG. 2014. PSD-95 promotes the stabilization of young synaptic contacts. *Philos*  
863           *Trans R Soc B Biol Sci* **369**:20130134. doi:10.1098/rstb.2013.0134
- 864   Tronson NC, Schrick C, Guzman YF, Huh KH, Srivastava DP, Penzes P, Guedea AL, Gao C,  
865           Radulovic J. 2009. Segregated Populations of Hippocampal Principal CA1 Neurons Mediating  
866           Conditioning and Extinction of Contextual Fear. *J Neurosci* **29**:3387–3394.  
867           doi:10.1523/JNEUROSCI.5619-08.2009
- 868   Troyner F, Bertoglio LJ. 2021. Nucleus reuniens of the thalamus controls fear memory  
869           reconsolidation. *Neurobiol Learn Mem* **177**:107343. doi:10.1016/j.nlm.2020.107343
- 870   Vallejo D, Codocedo JF, Inestrosa NC. 2017. Posttranslational Modifications Regulate the  
871           Postsynaptic Localization of PSD-95. *Mol Neurobiol* **54**:1759–1776. doi:10.1007/s12035-016-  
872           9745-1
- 873   van Rooij SJH, Stevens JS, Ely TD, Hinrichs R, Michopoulos V, Winters SJ, Ogbonmwan YE, Shin J,  
874           Nugent NR, Hudak LA, Rothbaum BO, Ressler KJ, Jovanovic T. 2018. The Role of the  
875           Hippocampus in Predicting Future Posttraumatic Stress Disorder Symptoms in Recently  
876           Traumatized Civilians. *Biol Psychiatry* **84**:106–115. doi:10.1016/j.biopsych.2017.09.005
- 877   Vertes RP, Linley SB, Hoover WB. 2015. Limbic circuitry of the midline thalamus. *Neurosci*  
878           *Biobehav Rev* **54**:89–107. doi:10.1016/j.neubiorev.2015.01.014
- 879   Xu W, Sudhof TC. 2013. A Neural Circuit for Memory Specificity and Generalization. *Science*  
880           **339**:1290–1295. doi:10.1126/science.1229534
- 881   Zanca RM, Sanay S, Avila JA, Rodriguez E, Shair HN, Serrano PA. 2019. Contextual fear memory  
882           modulates PSD95 phosphorylation, AMPAR subunits, PKM $\zeta$  and PI3K differentially between  
883           adult and juvenile rats. *Neurobiol Stress* **10**:100139. doi:10.1016/j.ynstr.2018.11.002.  
884  
885

886 **Supplementary Materials**

887 **Title:** Synaptic plasticity regulated by phosphorylation of PSD-95 Serine 73 in dorsal CA1 is  
888 required for contextual fear extinction

889 **Authors:** Magdalena Ziółkowska<sup>&,1</sup>, Malgorzata Borczyk<sup>&,1,2</sup>, Agata Nowacka<sup>1</sup>, Maria  
890 Nalberczak-Skóra<sup>1</sup>, Malgorzata Alicja Śliwińska<sup>1,3</sup>, Magdalena Robacha<sup>1</sup>, Kacper Łukasiewicz<sup>1</sup>,  
891 Anna Cały<sup>1</sup>, Edyta Skonieczna<sup>1</sup>, Kamil F. Tomaszewski<sup>1</sup>, Tomasz Wójtowicz<sup>4</sup>, Jakub  
892 Włodarczyk<sup>4</sup>, Tytus Bernas<sup>3,5</sup>, Ahmad Salamian<sup>1</sup> and Kasia Radwanska<sup>1\*</sup>.

893 <sup>1</sup>Laboratory of Molecular Basis of Behavior, the Nencki Institute of Experimental Biology of Polish  
894 Academy of Sciences.

895 <sup>2</sup>Department Molecular Neuropharmacology, Maj Institute of Pharmacology of Polish of Academy of  
896 Sciences, Warsaw, Poland

897 <sup>3</sup>Laboratory of Imaging Tissue Structure and Function, The Nencki Institute of Experimental Biology  
898 of Polish Academy of Sciences, Warsaw, Poland.

899 <sup>4</sup>Laboratory of Cell Biophysics, the Nencki Institute of Experimental Biology of Polish Academy of  
900 Sciences.

901 <sup>5</sup>Department of Anatomy and Neurology, VCU School of Medicine, 1101 East Marshall Street,  
902 Richmond, Virginia 23298

903 <sup>&</sup>equal contribution.

904 \*Corresponding author: Kasia Radwanska, Ph.D., Laboratory of Molecular Basis of Behavior, Nencki  
905 Institute of Experimental Biology of Polish Academy of Sciences, ul. L. Pasteura 3, Warsaw 02-093,  
906 Poland; e-mail: [k.radwanska@nencki.edu.pl](mailto:k.radwanska@nencki.edu.pl); tel: +48501736942

907

908 **SUPPLEMENTARY RESULTS**

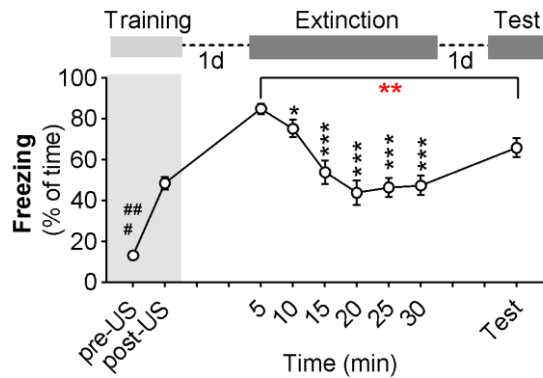

909

910 **Supplementary Figure 1. Experimental timeline and the freezing levels of the mice during**  
911 **contextual fear conditioning training, fear extinction session and fear extinction memory test.**  
912 C57BL/6j mice (n = 15) showed low freezing levels in a novel context before delivery of electric  
913 shocks (pre-US) and freezing increased during the training (post-US) ( $t = 14.91$ ,  $df = 14$ ,  $###P < 0.001$ ),  
914 indicating fear memory formation. Twenty-four hours later, the animals were re-exposed to the  
915 training context without US presentation for the fear extinction memory session (Extinction). Freezing  
916 levels were high at the beginning of the session, indicating fear memory retrieval and decreased within  
917 the session (RM ANOVA with Holm-Sidak's multiple comparisons tests (black asterisks),  $F(3.011,$   
918  $42.15) = 20.72$ ,  $P < 0.001$ ) indicating the formation of fear memory extinction. Next, we tested the  
919 consolidation of fear extinction memory 24 hours later (Test). At the beginning of Test, the freezing  
920 levels were lower than at the beginning of extinction 1 ( $t = 3.843$ ,  $df = 14$ ,  $**P = 0.0018$ ), indicating the  
921 formation of long-term fear extinction memory.  
922

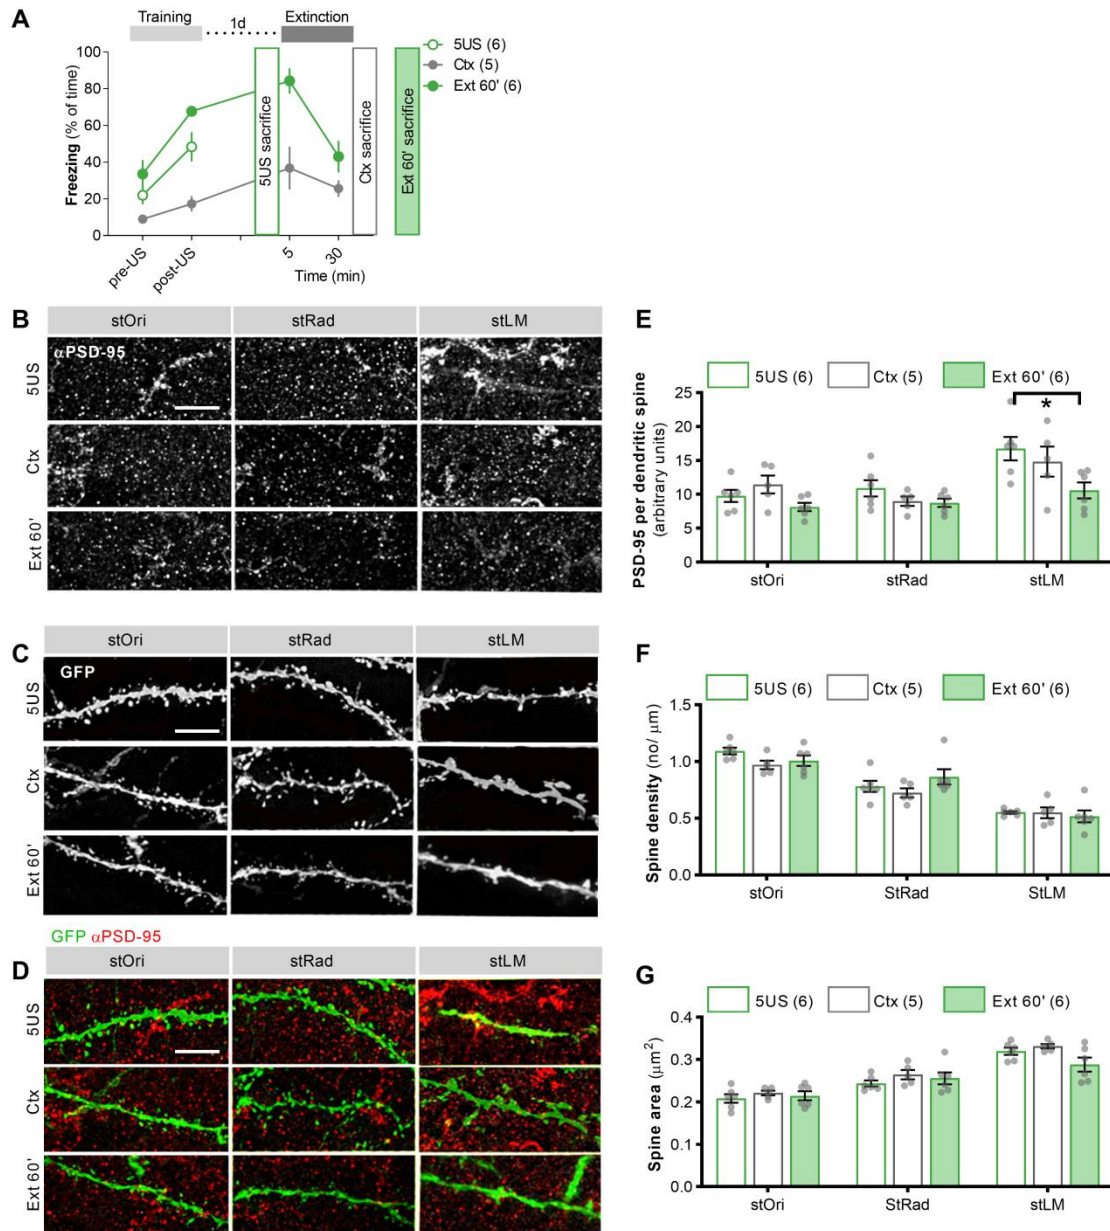

923  
 924 **Supplementary Figure 2. Fear extinction-induced PSD-95 and dendritic spines changes were**  
 925 **transient and could not be induced by the exposure to neutral context.** Dendritic spines were  
 926 analysed in three domains of dendritic tree of dCA1 area in Thy1-GFP(M) mice: stOri, stRad and  
 927 stLM. **(A)** Experimental timeline and freezing levels of mice from three experimental groups: fear  
 928 conditioning training (5US, mice sacrificed 1 day after contextual fear conditioning; n = 6), context  
 929 (Ctx, mice sacrificed immediately after the second exposure to novel context, no USs were delivered)  
 930 and fear extinction 60' (Ext 60', mice sacrificed 60 minutes after contextual fear extinction session,  
 931 n=6). **(B-D)** Representative confocal images of PSD-95 immunostaining. Thy1-GFP and their  
 932 colocalization (maximum projections of z-stacks composed of 20 scans) are shown for three domains  
 933 of the dendritic tree. **(E)** Summary of data showing PSD-95 expression per dendritic spine in stOri,  
 934 stRad and stLM (mouse: 5US = 6; Ctx = 5; Ext 60' = 6). There was no effect of training ( $F(2, 14) =$   
 935  $2.799, P = 0.095$ ), but a significant effect of dendritic domain ( $F(1.574, 22.04) = 32.00, P < 0.001$ ) and



936 training x dendritic domain interaction ( $F(4, 28) = 4.191, P = 0.009$ ). *Post hoc* Tukey's test showed  
937 that PSD-95 area per dendritic spine was decreased in stLM in Ext 60' group as compared to the 5US  
938 animals ( $P = 0.039$ ). (F) Summary of data showing dendritic spines density. There was no effect of  
939 training ( $F(2, 14) = 1.620, P = 0.233$ ), but a significant effect of dendritic domain ( $F(1.874, 26.23) =$   
940  $79.64, P < 0.001$ ), and no training x dendritic domain interaction ( $F(4, 28) = 1.43, P = 0.250$ ). (G)  
941 Summary of data showing average dendritic spine area. There was no effect of training ( $F(2, 14) =$   
942  $3.162, P = 0.074$ ), but a significant effect of dendritic domain ( $F(1.340, 18.76) = 56.36, P < 0.001$ ),  
943 and no training x dendritic domain interaction ( $F(4, 28) = 1.33, P = 0.283$ ). For E-G each dot  
944 represents one mouse. Scale bars: E, G, H: 15  $\mu\text{m}$ . \* $P < 0.05$ , \*\* $P < 0.01$ ; \*\*\* $P < 0.001$ .

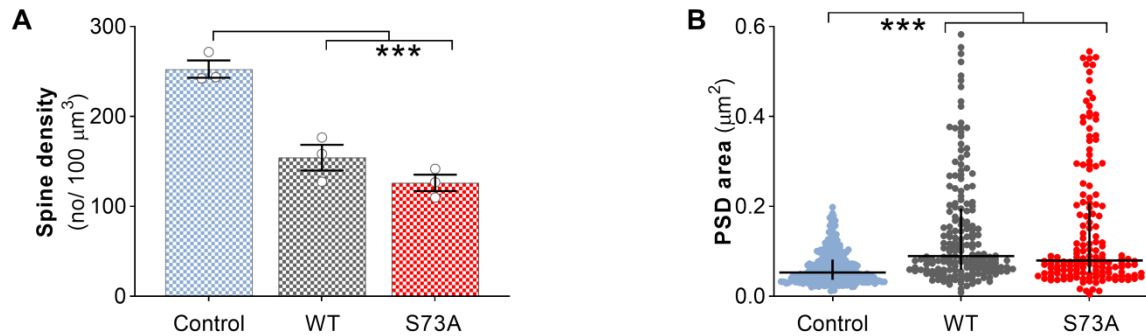

945

946 **Supplementary Figure 3. Overexpression of PSD-95 (WT and S73A) in dCA1 reduces dendritic**  
947 **spine density and increases PSDs size.** Mice were stereotactically injected with AAVs encoding  
948 Control (mCherry), PSD-95 WT or S73A in the dCA1 and trained in contextual fear memory  
949 conditioning and extinction. (A) Mean density of dendritic spines was downregulated after  
950 overexpression of WT and S73A, compared to Control mice (One-way ANOVA,  $F(2, 6) = 34.59,$   
951 \*\*\* $P < 0.001$ ). (B) Median size of PSDs was increased after overexpression of WT and S73A,  
952 compared to Control mice (Kruskal-Wallis statistic,  $H = 108.9, ***P < 0.001$ ).

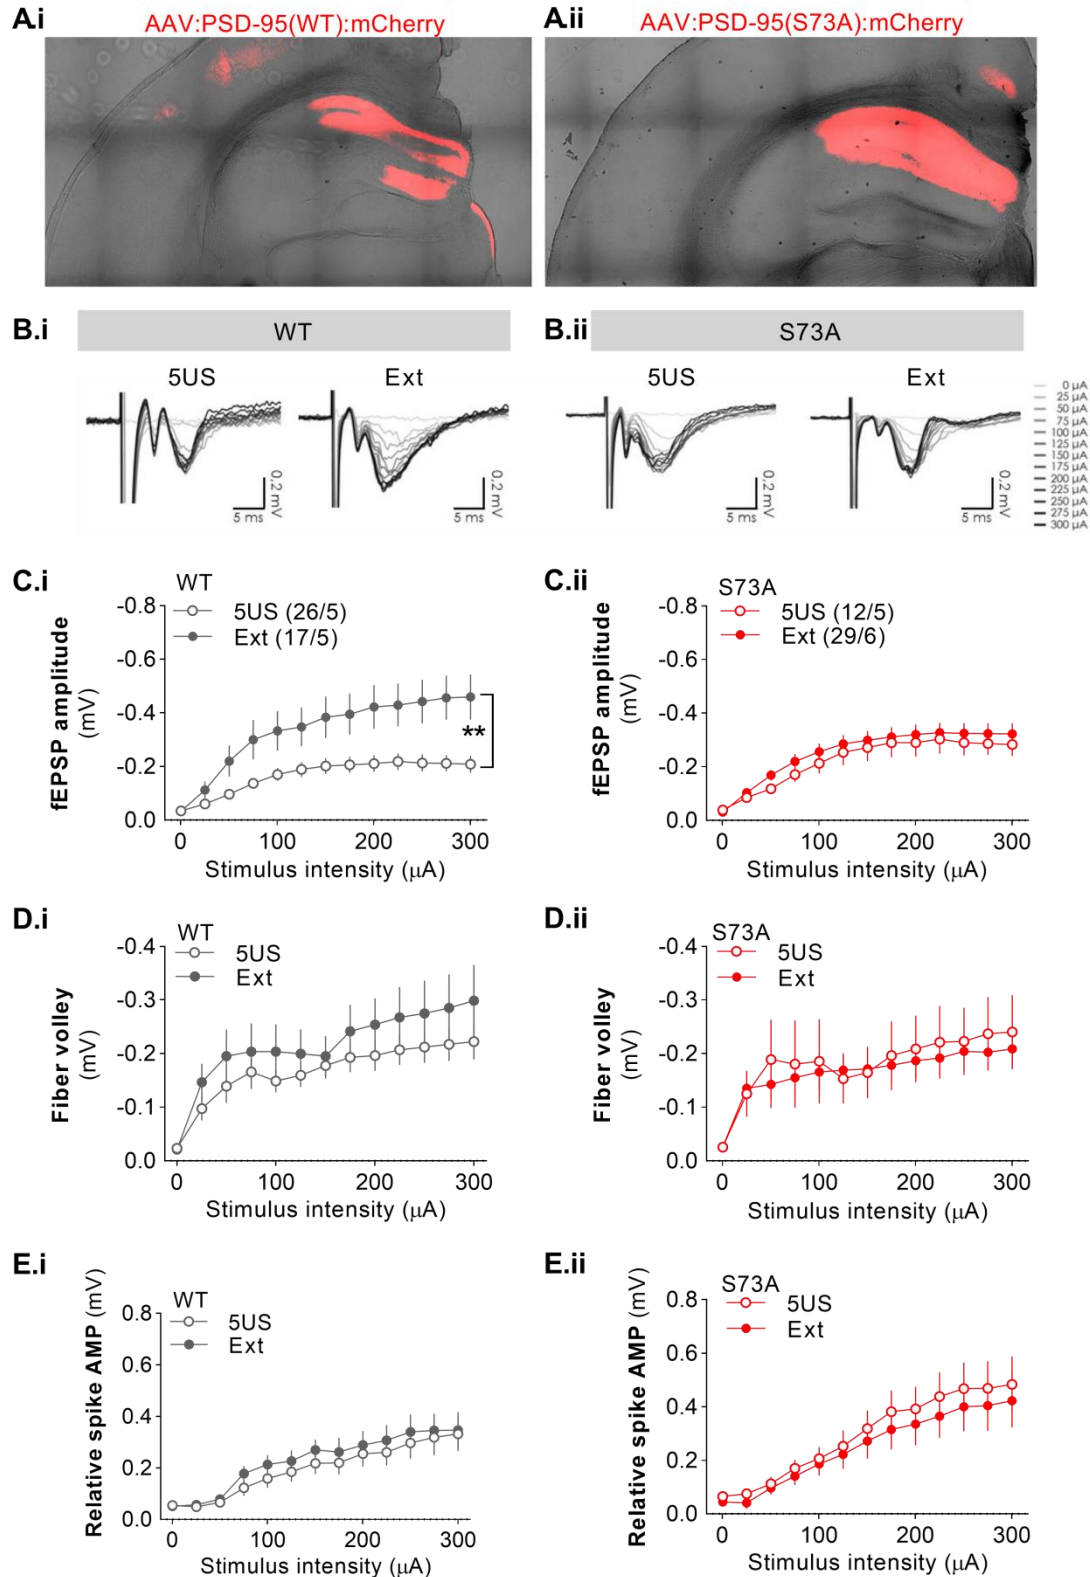

953

954 **Supplementary Figure 4. Phosphorylation of PSD-95 at S73 is required for fEPSP changes in**  
 955 **stOri after fear extinction training.** Mice were injected with PSD-95 WT or S73A in dCA1. Field  
 956 excitatory postsynaptic potentials (fEPSPs) were recorded in stOri of dCA1 in response to the  
 957 stimulation from the Schaffer collaterals. Moreover, the population spikes in the stratum pyramidale

958 and fiber volleys were recorded and measured. **(A)** Microphotographs of PSD-95 WT and S73A  
 959 expression in the CA1. **(B)** Representative fEPSPs evoked by stimuli of different intensities in stOri of  
 960 the mice expressing PSD-95 WT and S73A respectively and sacrificed before or after fear extinction  
 961 training. **(C)** Input–output plot for stimulus intensity versus fEPSP amplitude recorded in response to  
 962 increasing intensities of stimulation in stOri. The fEPSP amplitudes were affected by the extinction  
 963 training in the mice expressing **(i)** WT (RM ANOVA,  $F(1, 42) = 7.581$ ,  $**P = 0.0087$ ), **(ii)** but not  
 964 S73A ( $F(1, 36) = 0.404$ ,  $P = 0.528$ ). **(D)** Input–output functions for stimulus intensity versus fiber  
 965 volley recorded in response to increasing intensities of stimulation. No effect of contextual fear  
 966 extinction was observed in mice expressing **(i)** WT ( $F(1, 30) = 0.080$ ,  $P = 0.778$ ) or **(ii)** S73A ( $F(1, 30)$   
 967  $= 0.080$ ,  $P = 0.778$ ). The numbers of the analysed sections/mice per experimental group are indicated  
 968 in (C).

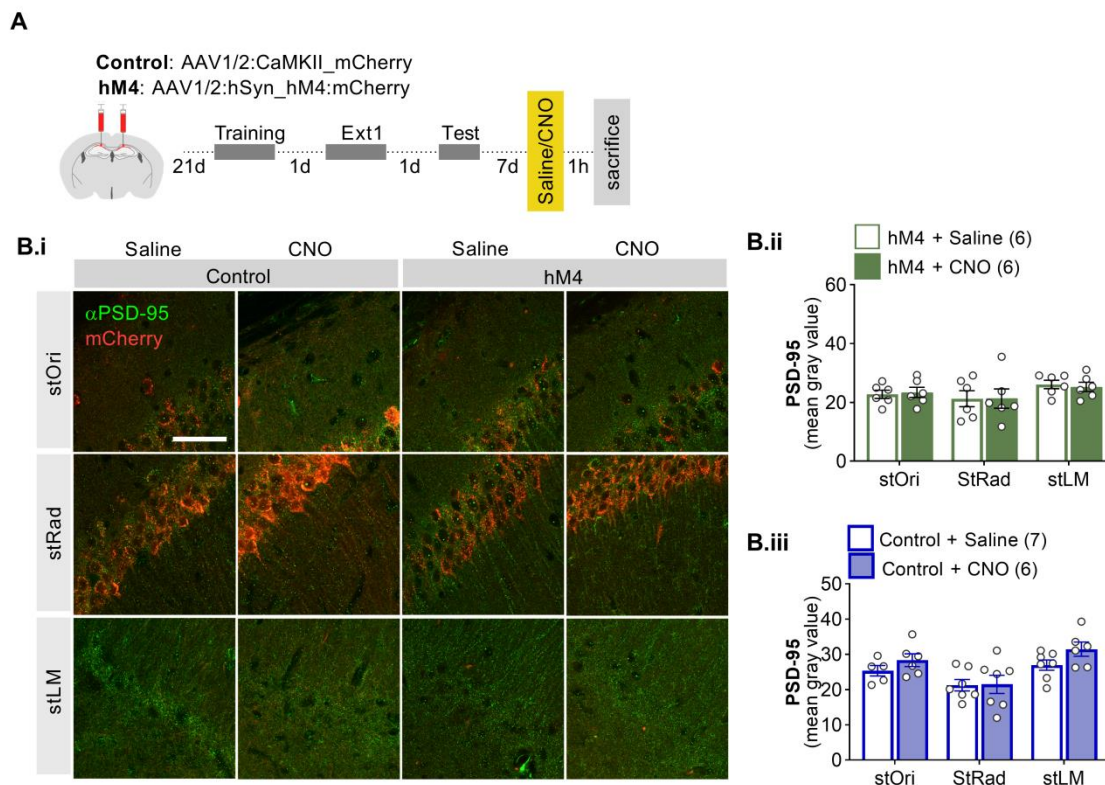

969 **Supplementary Figure 5. Chemogenetic inhibition of dCA1 after training does not affect PSD-95**  
 970 **expression.** **(A)** Experimental timeline during fear conditioning and fear extinction sessions (ext1 and  
 971 ext2) of the mice with Control and hM4 virus. Mice were trained three weeks after the surgery and  
 972 virus expression. In all groups, saline or CNO (1 mg/kg) was systemically injected 7 days after the  
 973 ext2. Mice were sacrificed 60 minutes after the injection. Behavioral data are shown in Fig. 2. **(B)** **(i)**  
 974 Representative, confocal scans of the brain slices immunostained for PSD-95. Scale bar, 10  $\mu$ m. **(ii-iii)**  
 975 Summary of data quantifying the expression of PSD-95 in three domains of dCA1 in mice with  
 976 Control or hM4 virus. No effect of the drug was observed in any of the virus groups (RM ANOVA,  
 977 Control:  $F(1, 12) = 1.823$ ,  $P = 0.322$ ; hM4:  $F(1, 10) = 0.0003$ ,  $P = 0.988$ ). The numbers of mice per  
 978 experimental group are in the legends **(B.ii-iii)**.  
 979

980

## 981 SUPPLEMENTARY MATERIALS AND METHODS

### 982 *Animals*

983 C57BL/6J male mice were purchased from Białystok University, Poland. Thy1-GFP(M) (The  
984 Jackson Laboratory, JAX:007788, RRID:IMSR\_JAX:007788) mutant mice were bred as  
985 heterozygotes at Nencki Institute, and PCR genotyped as previously described (Feng et al., 2000). All  
986 mice in the experiments were 7-9-week old. The mice were housed in groups of two to six and  
987 maintained on a 12 h light/dark cycle with food and water ad libitum. All experiments with transgenic  
988 mice used approximately equal numbers of males and females. The experiments were undertaken  
989 according to the Animal Protection Act of Poland and approved by the I Local Ethics Committee  
990 (261/2012, Warsaw, Poland).

### 991 *Contextual fear conditioning*

992 The animals were trained in a conditioning chamber (Med Associates Inc, St Albans, USA) in  
993 a soundproof box. The chamber floor had a stainless steel grid for shock delivery. Before training, the  
994 chamber was cleaned with 70% ethanol, and a paper towel soaked in ethanol was placed under the grid  
995 floor. To camouflage background noise in the behavioral room, a white noise generator was placed  
996 inside the soundproof box.

997 On the conditioning day, the mice were brought from the housing room into a holding room to  
998 acclimatize for 30 min before training. Next, mice were placed in the training chamber, and after a 148  
999 s introductory period, a foot shock (2 s, 0.7 mA) was presented. The shock was repeated 5 times, at 90  
1000 s inter-trial intervals. Thirty seconds after the last shock, the mouse was returned to its home cage.  
1001 Contextual fear memory was tested and extinguished 24 h after training by re-exposing mice to the  
1002 conditioning chamber for 30 minutes without US presentation, followed by the second 5-minute test  
1003 session on the following day. During extensive contextual fear extinction, 30-minut fear extinction  
1004 sessions were repeated on days 2, 3, 14, 15, and 16. Moreover mice activity and freezing were tested  
1005 in context B (Ctx B) on day 17. A video camera was fixed inside the door of the sound attenuating box  
1006 for the behavior to be recorded and scored. Freezing behavior (defined as complete lack of movement,

1007 except respiration) and locomotor activity of mice were automatically scored. The experimenters were  
1008 blind to the experimental groups.

1009 *CNO administration.* Clozapine N-Oxide (CNO) was dissolved in 0.9% saline. One or 3 mg/kg CNO  
1010 was intraperitoneally (i.p.) injected 30 min before the behavioral extinction session. These doses of  
1011 CNO did not induce any overt abnormal behaviors except for those reported in the study.

#### 1012 *Immunostaining*

1013 Mice were anesthetized and perfused with cold phosphate buffer pH 7.4, followed by 0.5%  
1014 4% PFA in phosphate buffer. Brains were removed and postfixed o/n in 4°C. Brains were kept in 30%  
1015 sucrose in PBS for 72h. Coronal brain sections were prepared using cryosectioning (40 µm thick,  
1016 Cryostat CM1950, Leica Biosystems Nussloch GmbH, Wetzlar, Germany) and stored in a  
1017 cryoprotecting solution in -20°C (PBS, 15% sucrose (Sigma-Aldrich), 30% ethylene glycol (Sigma-  
1018 Aldrich), and 0.05% NaN<sub>3</sub> (SigmaAldrich). Before staining, sections were washed 3 × PBS and  
1019 blocked for 1 hour at room temperature (RT) in 5% NDS with 0.3% Triton X-100 in PBS and then  
1020 incubated o/n, 4°C with PSD-95 primary antibodies (1:500, Millipore, MAB1598,  
1021 RRID:AB\_11212185). On the second day slices were washed 3 × PBS with 0,3% Triton X-100 and  
1022 incubated for 90 minutes with secondary antibodies conjugated with AlexaFluor 555 (1:500,  
1023 Invitrogen, A31570, RRID:AB\_2536180). Slices were then mounted on microscope slides (Thermo  
1024 Fisher Scientific) and covered with coverslips in Fluoromount-G medium with DAPI (00-4959-52,  
1025 Invitrogen).

#### 1026 *Confocal microscopy and image quantification*

1027 The microphotographs of dendritic spines in Thy1-GFP mice and fluorescent PSD-95  
1028 immunostaining were taken on a Spinning Disc confocal microscope (63 × oil objective, NA 1.4, pixel  
1029 size 0.13 µm × 0.13 µm) (Zeiss, Göttingen, Germany). We took microphotographs (16 bit, z-stacks of  
1030 12-48 scans; 260 nm z-steps) of the dendrites from stratum oriens (stOri), stratum radiatum (stRad)  
1031 and stratum lacunosum-moleculare (stLM) (6 dendrites per region per animal) of dorsal CA1  
1032 pyramidal neurons (AP, Bregma from -1.7 to 2.06). Each dendritic spine was manually outlined, and



1033 the spine area was measured with ImageJ 1.52n software measure tool. Custom-written Python scripts  
1034 were used to analyze the mean gray value of PSD-95(+) puncta per dendritic spine.

1035 The PSD-95 fluorescent immunostaining and PSD-95:mCherry over-expression were  
1036 analyzed with Zeiss LSM 800 microscope equipped with Airy-Scan detection (63× oil objective and  
1037 NA 1.4, pixel size 0.13  $\mu\text{m} \times 0.13 \mu\text{m}$ , 8 bit) (Zeiss, Göttingen, Germany). A series of 18 continuous  
1038 optical sections (67.72  $\mu\text{m} \times 67.72 \mu\text{m}$ ), at 0.26  $\mu\text{m}$  intervals, were scanned along the z-axis of the  
1039 tissue section. Six to eight z-stacks of microphotographs were taken per animal per region, from every  
1040 sixth section through dCA1. Total PSD-95 levels was assessed as an image mean gray value. As  
1041 shown by CLEM staining exogenous PSD-95:mCherry localises not only within dendritic spines but  
1042 also dendrites (Figure 2E). However, the synaptic and dendritic PSD-95:mCherry puncta significantly  
1043 differ in dimensions and intensity. Based on these differences synaptic PSD-95:mCherry was  
1044 identified and analysed as roundish, small and very intensive puncta that clearly differ from the  
1045 background (analysed in ImageJ with function Analyze Particles, with the size filter attribute set to:  
1046 0.00-0.70, and Threshold separately adjusted for each stratum by the experimenter blind to the  
1047 experimental groups) (Figure 2E). Since dendritic PSD-95:mCherry is unlikely related to synaptic  
1048 processes and PSD size it was ignored during the analysis (areas that were large and only slightly  
1049 darker from the background). Exogenous synaptic PSD-95:mCherry levels were expressed as % area  
1050 of ROI (Figure 2K).

#### 1051 *Stereotactic surgery*

1052 Mice were fixed in a stereotactic frame (51503, Stoelting, Wood Dale, IL, USA) and kept  
1053 under isoflurane anesthesia (5% for induction, 1.5-2.0% during surgery). Adeno-associated viruses,  
1054 serotype 1 and 2, (AAV1/2), solutions were injected into the dorsal CA1 area (Paxinos & Franklin  
1055 2001) at coordinates in relation to Bregma (AP, -2.1mm; ML,  $\pm 1.1 \text{ mm}$ ; DV, -1.3mm). 450 nl of AAV  
1056 solutions were injected into the CA1 through a beveled 26 gauge metal needle, and 10  $\mu\text{l}$  microsyringe  
1057 (SGE010RNS, WPI, USA) connected to a pump (UMP3, WPI, Sarasota, USA), and its controller  
1058 (Micro4, WPI, Sarasota, USA) at a rate 50 nl/ min. The needle was then left in place for 5 min,  
1059 retracted +100 nm DV, and left for an additional 5 min to prevent unwanted spread of the AAV



1060 solution. Titers of AAV1/2 were:  $\alpha$ CaMKII\_PSD-95(WT):mCherry (PSD-95(WT)):  $1.35 \times 10^9$ /[l,  
1061  $\alpha$ CaMKII\_PSD-95(S73A):mCherry (PSD-95(S73A)):  $9.12 \times 10^9$ /[l),  $\alpha$ CaMKII\_mCherry (mCherry):  
1062 viral titer  $7.5 \times 10^7$ /[l (obtained from Karl Deisseroth's Lab), hSyn\_HA-hM4D(Gi):mCherry (hM4)  
1063 (Addgene plasmid #50475):  $4.59 \times 10^7$ /[l. Mice were allowed to recover from anesthesia for 2-3 h on a  
1064 heating pad and then transferred to individual cages where they stayed until complete skin healing, and  
1065 next, they were returned to the home cages. The viruses were prepared at the Nencki Institute core  
1066 facility, Laboratory of Animal Models. After training, the animals were perfused with 4% PFA in PBS  
1067 and brain sections from the dorsal hippocampus were immunostained for PSD-95 and imaged with  
1068 Zeiss Spinning Disc confocal microscope (magnification: 10x) to assess the extent of the viral  
1069 expression and PSD-95 expression.

### 1070 *3D electron microscopy*

1071 Mice were transcardially perfused with cold phosphate buffer pH 7.4, followed by 0.5% EM-  
1072 grade glutaraldehyde (G5882 Sigma-Aldrich) with 2% PFA in phosphate buffer pH 7.4 and postfixed  
1073 overnight in the same solution. Brains were then taken out of the fixative and cut on a vibratome  
1074 (Leica VT 1200) into 100  $\mu$ m slices. Slices were kept in phosphate buffer pH 7.4, with 0.1% sodium  
1075 azide in 4°C for up to 14 days. For AAV-injected animals, the fluorescence of exogenous proteins was  
1076 confirmed in all slices by fluorescent imaging. Then, slices were washed 3  $\times$  in cold phosphate buffer  
1077 and postfixed with a solution of 2% osmium tetroxide (#75632 Sigma-Aldrich) and 1.5 % potassium  
1078 ferrocyanide (P3289 Sigma-Aldrich) in 0.1 M phosphate buffer pH 7.4 for 60 min on ice. Next,  
1079 samples were rinsed 5  $\times$  3 min with double distilled water (ddH<sub>2</sub>O) and subsequently exposed to 1%  
1080 aqueous thiocarbohydrazide (TCH) (#88535 Sigma) solution for 20 min. Samples were then washed 5  
1081  $\times$  3 min with ddH<sub>2</sub>O and stained with osmium tetroxide (1% osmium tetroxide in ddH<sub>2</sub>O, without  
1082 ferrocyanide) for 30 min in RT. Afterward, slices were rinsed 5  $\times$  3 min with ddH<sub>2</sub>O and incubated in  
1083 1% aqueous solution of uranium acetate overnight in 4°C. The next day, slices were rinsed 5  $\times$  3 min  
1084 with ddH<sub>2</sub>O, incubated with lead aspartate solution (prepared by dissolving lead nitrate in L-aspartic  
1085 acid as previously described (Deerinck et al., 2010)) for 30 min in 60°C and then washed 5  $\times$  3 min  
1086 with ddH<sub>2</sub>O and dehydration was performed using graded dilutions of ice-cold ethanol (30%, 50%,

1087 70%, 80%, 90%, and 2 × 100% ethanol, 5 min each). Then slices were infiltrated with Durcupan resin.  
1088 A(17 g), B(17 g) and D(0,51 g) components of Durcupan (#44610 Sigma-Aldrich) were first mixed on  
1089 a magnetic stirrer for 30 min and then 8 drops of DMP-30 (#45348 Sigma) accelerator were added  
1090 (Knott et al., 2009). Part of the resin was then mixed 1:1 (v/v) with 100% ethanol and slices were  
1091 incubated in this 50% resin on a clock-like stirrer for 30 min in RT. The resin was then replaced with  
1092 100% Durcupan for 1 hour in RT and then 100% Durcupan infiltration was performed o/n with  
1093 constant slow mixing. The next day, samples were infiltrated with freshly prepared resin (as described  
1094 above) for another 2 hours in RT, and then embedded between flat Aclar sheets (Ted Pella #10501-  
1095 10). Samples were put in a laboratory oven for at least 48 hours at 65°C for the resin to polymerize.  
1096 After the resin hardened, the Aclar layers were separated from the resin embedded samples, dCA1  
1097 region was cut out with a razorblade. Caution was taken for the piece to contain minimal resin.  
1098 Squares of approximately 1 × 1 × 1 mm were attached to aluminium pins (Gatan metal rivets, Oxford  
1099 instruments) with very little amount of cyanacrylamide glue. After the glue dried, samples were  
1100 mounted to the ultramicrotome to cut 1 µm thick slices. Slices were transferred on a microscope slide,  
1101 briefly stained with 1% toluidine blue in 5% borate and observed under a light microscope to confirm  
1102 the region of interest (ROI). Next, samples were grounded with silver paint (Ted Pella, 16062-15) and  
1103 pinned for drying for 4 – 12 hours, before the specimens were mounted into the 3View2 chamber.

#### 1104 *SBEM imaging and 3D reconstructions*

1105 Samples were imaged with Zeiss SigmaVP (Zeiss, Oberkochen, Germany) scanning electron  
1106 microscope equipped with 3View2 chamber using a backscatter electron detector. Scans were taken in  
1107 the middle portion of the CA1 stOri of the dorsal hippocampus. From each sample, 200 sections were  
1108 collected (thickness 60 nm). Imaging settings: high vacuum with EHT 2.9-3.8 kV, aperture: 20 µm,  
1109 pixel dwell time: 3 µs, pixel size: 5 – 6.2 nm. Scans were aligned using the ImageJ software (ImageJ -  
1110 > Plugins -> Registration -> StackReg) and saved as .tiff image sequence. Next, alignment scans were  
1111 imported to Reconstruct software (Fiala 2005), available at  
1112 <http://synapses.clm.utexas.edu/tools/reconstruct/reconstruct.stm> (Synapse Web Reconstruct,  
1113 RRID:SCR\_002716). Spine density was analyzed from 3 bricks per animal with the unbiased brick

1114 method (Fiala and Harris 2001) per tissue volume. Brick dimensions  $4.3 \times 4.184 \times 3 \mu\text{m}$  were chosen  
1115 to exceed the length of the largest profiles in the data sets at least twice. To calculate the density of  
1116 dendritic spines, the total volume of large tissue discontinuities was subtracted from the volume of the  
1117 brick.

1118 A structure was considered to be a dendritic spine when it was a definite protrusion from the  
1119 dendrite, with electron-dense material (representing postsynaptic part of the synapse, PSD) on the part  
1120 of the membrane that opposed an axonal bouton with at least 3 vesicles within a 50-nm distance from  
1121 the cellular membrane facing the spine. For 3D reconstructions, PSDs and dendritic spines in one  
1122 brick were reconstructed for each sample. PSDs were first reconstructed and second, their dendritic  
1123 spines were outlined. To separate dendritic spine necks from the dendrites, a cut-off plane was used  
1124 approximating where the dendritic surface would be without the dendritic spine. PSD volume was  
1125 measured by outlining dark, electron-dense area on each PSD containing section. The PSD area was  
1126 measured manually according to the Reconstruct manual. All non-synaptic protrusions were omitted in  
1127 this analysis. For multi-synaptic spines, the PSD areas and volumes have been summed. In total, 1317  
1128 dendritic spines with their PSDs were manually segmented with the annotators blind to sample  
1129 condition.

### 1130 *Correlative light-electron microscopy (CLEM)*

1131 CLEM workflow was based on a previously established protocol with some modifications  
1132 (Bishop et al., 2011). Mice infused with PSD-95(WT) in the CA1 were perfused as described above.  
1133 Brains were then removed and postfixed o/n in  $4^\circ\text{C}$ .  $100 \mu\text{m}$  thick brain slices were cut on a vibratome  
1134 and embedded in low melting point agarose in phosphate buffer and mounted into imaging chambers.  
1135 mCherry fluorescence in the stRad was photographed using Zeiss LSM800, z-stacks of 60 images ( $60$   
1136  $\mu\text{m}$  thick) at  $63 \times$  magnification. Next, the slice was transferred under the 2P microscope (Zeiss MP  
1137 PA Setup), where a Chameleon laser was used to brand mark the ROI (laser length  $870 \text{ nm}$ , laser  
1138 power  $85\%$ , 250 scans of each line). Then, SBEM staining was performed as described above. The  
1139 resin-embedded hippocampus was then divided into 4 rectangles and each was mounted onto metal

1140 pins to locate the laser-induced marks. SBEM scanned within the laser marked frame. The fluorescent  
1141 image was overlaid onto the SBEM image using dendrites and cell nuclei as landmarks using ImageJ  
1142 1.48k software (RRID:SCR\_003070).

### 1143 *Electrophysiology*

1144 Mice were deeply anesthetized with Isoflurane, decapitated and the brains were rapidly  
1145 dissected and transferred into ice-cold cutting artificial cerebrospinal fluid (ACSF) consisting of (in  
1146 mM): 87 NaCl, 2.5 KCl, 1.25 NaH<sub>2</sub>PO<sub>4</sub>, 25 NaHCO<sub>3</sub>, 0.5 CaCl<sub>2</sub>, 7 MgSO<sub>4</sub>, 20 D-glucose, 75  
1147 saccharose equilibrated with carbogen (5% CO<sub>2</sub>/95% O<sub>2</sub>). The brain was cut to two hemispheres and  
1148 350  $\mu$ m thick coronal brain slices were cut in ice-cold cutting ACSF with Leica VT1000S vibratome.  
1149 Slices were then incubated for 15 min in cutting ACSF at 32°C. Next the slices were transferred to  
1150 recording ACSF containing (in mM): 125 NaCl, 2.5 KCl, 1.25 NaH<sub>2</sub>PO<sub>4</sub>, 25 NaHCO<sub>3</sub>, 2.5 CaCl<sub>2</sub>, 1.5  
1151 MgSO<sub>4</sub>, 20 D-glucose equilibrated with carbogen and incubated for minimum 1 hour at room  
1152 temperature (RT).

1153 Extracellular field potential recordings were recorded in a submerged chamber perfused with  
1154 recording ACSF in RT. The potentials were evoked with a Stimulus Isolator (A.M.P.I Isoflex) with a  
1155 concentric bipolar electrode (FHC, CBARC75) placed in the stOri of CA2 on the experiment. The  
1156 stimulating pulses were delivered at 0.1 Hz and the pulse duration was 0.3 ms. Recording electrodes  
1157 (resistance 1-4 M $\Omega$ ) were pulled from borosilicate glass (WPI, 1B120F-4) with a micropipette puller  
1158 (Sutter Instruments, P-1000) and filled with recording ACSF. The recording electrodes were placed in  
1159 stOri of dCA1. Simultaneously, a second recording electrode was placed in the stratum pyramidale to  
1160 measure population spikes. For each slice, the recordings were done in stOri. Recordings were  
1161 acquired with MultiClamp 700B amplifier (Molecular Devices, California, USA), digitized with  
1162 Digidata 1550B (Molecular Devices, California, USA) and pClamp 10.7 Clampex 10.0 software  
1163 (Molecular Devices, California, USA). Input/output curves were obtained by increasing stimulation  
1164 intensity by 25  $\mu$ A in the range of 0-300  $\mu$ A. All electrophysiological data was analyzed with

1165 AxoGraph 1.7.4 software (Axon Instruments, U.S.A). The amplitude of fEPSP, relative amplitude of  
1166 population spikes and fiber volley were measured.

1167 *Statistics*

1168 Data are presented as mean  $\pm$  standard error of the mean (SEM) for populations with normal  
1169 distribution or as median  $\pm$  interquartile range (IQR) for populations with non-normal distribution. An  
1170 animal was used as a biological replication in all experiments except for the dendritic spine size  
1171 distribution analysis. When the data met the assumptions of parametric statistical tests, results were  
1172 analysed by one- or repeated measures two-way ANOVA, followed by Tukey's or Fisher's *post hoc*  
1173 tests, where applicable. Data were tested for normality by using the Shapiro-Wilk test of normality and  
1174 for homogeneity of variances by using the Levene's test. For repeated-measure data with missing  
1175 observation, a linear mixed model was used to analyze the results, followed by pairwise comparisons  
1176 with Sidak adjustment for multiple comparisons. Areas of dendritic spines and PSDs did not follow  
1177 normal distributions and were analysed with the Kruskal-Wallis test. Frequency distributions of PSD  
1178 area to the spine volume ratio were compared with the Kolmogorov-Smirnov test. Correlations were  
1179 analysed using Spearman correlation (Spearman  $r$  ( $s_r$ ) is shown), and the difference between slopes or  
1180 elevation between linear regression lines was calculated with ANCOVA. Differences between the  
1181 experimental groups were considered statistically significant if  $P < 0.05$ . Analyses were performed  
1182 using the Graphpad Prism 8 or Statistica software. Mice were excluded from the analysis only if they  
1183 did not express the tested virus in the target region, or the value exceeded 3 standard deviations from  
1184 the mean.

1185

1186
